1 **TITLE:**

2 A shift from pleiotropic to modular adaptation revealed by a high-resolution two-step adaptive  
3 walk

4  
5 **AUTHORS:**

6 Grant Kinsler<sup>1,2</sup>, Yuping Li<sup>3,4</sup>, Gavin Sherlock<sup>\*,3</sup>, Dmitri A. Petrov<sup>\*,1</sup>

7  
8 **AFFILIATIONS:**

9 <sup>1</sup>Department of Biology, Stanford University

10 <sup>2</sup>Department of Bioengineering, University of Pennsylvania

11 <sup>3</sup>Department of Genetics, Stanford University

12 <sup>4</sup>Department of Microbiology & Immunology, UC San Francisco

13 \*Equal contribution

14  
15 **ABSTRACT:**

16  
17 Evolution by natural selection is expected to be a slow and gradual process. In particular, the  
18 mutations that drive evolution are predicted to be small and modular, incrementally improving a  
19 small number of traits. However, adaptive mutations identified early in microbial evolution  
20 experiments, cancer, and other systems often provide substantial fitness gains and  
21 pleiotropically improve multiple traits at once. We asked whether such pleiotropically adaptive  
22 mutations are common throughout adaptation or are instead a rare feature of early steps in  
23 evolution that tend to target key signaling pathways. To do so, we conducted barcoded second-  
24 step evolution experiments initiated from five first-step mutations identified from a prior yeast  
25 evolution experiment. We then isolated hundreds of second-step mutations from these evolution  
26 experiments, measured their fitness and performance in several growth phases, and conducted  
27 whole-genome sequencing of the second-step clones. Here, we found that while the vast  
28 majority of mutants isolated from the first-step of evolution in this condition show patterns of  
29 pleiotropic adaptation - improving both performance in fermentation and respiration growth  
30 phases - second-step mutations show a shift towards modular adaptation, mostly improving  
31 respiration performance and only rarely improving fermentation performance. We also identified  
32 a shift in the molecular basis of adaptation from genes in cellular signaling pathways towards  
33 genes involved in respiration and mitochondrial function. Our results suggest that the genes in  
34 cellular signaling pathways are particularly capable of providing large, adaptively pleiotropic  
35 benefits to the organism due to their ability to coherently affect many phenotypes at once. As  
36 such, these genes may serve as the source of pleiotropic adaptation in the early stages of  
37 evolution, and once these become exhausted, organisms then adapt more gradually, acquiring  
38 smaller, more modular mutations.

## 39 INTRODUCTION

40

41 As organisms adapt to their environment, they face a multi-dimensional optimization problem.  
42 To be advantageous, new mutations must improve one or more traits under selection without  
43 imposing strong costs on other traits. Theoretical analyses of adaptive walks in multi-  
44 dimensional trait spaces suggest that mutations that generate small phenotypic shifts in few  
45 traits are more likely to be beneficial overall than mutations of large phenotypic effect on many  
46 traits (Orr 2000). Consequently, adaptive mutations are expected to both provide small fitness  
47 benefits and to be **modular** – that is, affect only a few traits without affecting others.

48

49 Despite these theoretical expectations, microbial evolution experiments have revealed that early  
50 adaptation often proceeds by single mutations that provide large fitness benefits (Y. Li, Petrov,  
51 and Sherlock 2019; Wisser, Ribeck, and Lenski 2013; Levy et al. 2015; Johnson et al. 2021;  
52 Venkataram et al. 2016). Moreover, in the cases where the improvement of these mutations has  
53 been decomposed into distinct trait performances, it is often observed that these mutations  
54 improve multiple traits simultaneously (as illustrated in Figure 1A) (Y. Li, Petrov, and Sherlock  
55 2019; Y. Li et al. 2018; Bono et al. 2017; Jasmin and Kassen 2007).

56

57 The observation of adaptive mutations improving multiple performances at once, which we here  
58 term “**pleiotropic adaptation**”, can be easily seen in a series of evolution experiments  
59 conducted with barcoded yeast in which a comprehensive set of adaptive mutations was  
60 profiled for their effects on likely orthogonal trait performances (Levy et al. 2015; Venkataram et  
61 al. 2016; Y. Li, Petrov, and Sherlock 2019; Y. Li et al. 2018). Li et al (2018) in particular showed  
62 that ~85% of first-step adaptive mutations isolated from their evolution experiment improve  
63 performance in both fermentation and respiration growth phases, both of which are under  
64 selection during the yeast growth cycle. These pleiotropic mutants from this initial step of  
65 adaptation, many of which harbor only a single mutation in the Ras/PKA pathway, are also  
66 strongly adaptive, providing fitness benefits of up to 120% per growth cycle (roughly 15% per  
67 generation) (Venkataram et al. 2016). Such large-effect Ras/PKA pathway mutations are  
68 commonly found in early evolution in other systems, such as cancer progression (Bailey et al.  
69 2018). As the study we present here follows on from our previous series of findings, we use  
70 these yeast mutations as a motivating example throughout the rest of the introduction.

71

72 How do we reconcile our observations of pleiotropic adaptation (Y. Li et al. 2018) with  
73 theoretical expectations that these mutations should affect only a small number of traits? One  
74 possibility is that fermentation and respiration performances are not as distinct as we believe.  
75 However, a number of adaptive mutations do improve only one of these performances,  
76 demonstrating that it is in fact possible to shift one performance without affecting the other.

77

78 The other possibility is that the Ras/PKA pathway is wired in such a way that mutations that  
79 target this pathway are capable of being both pleiotropic and adaptive, affecting many  
80 phenotypes of the organism but in a coherent and coordinated fashion. It might be that

81 mutations in general might not have these patterns of pleiotropic adaptation and instead exhibit  
82 **“modular adaptation”**, improving only a subset of the traits under selection. Thus, isolating and  
83 characterizing the effects of subsequent mutations, which may be less likely to target this  
84 already-mutated pathway, might better reflect the pleiotropic properties of adaptive mutations  
85 beyond these extremely beneficial first-step mutations in the Ras/PKA pathway. One way in  
86 which we can assess whether the observed adaptive pleiotropy is a common feature of adaptive  
87 mutations is to conduct adaptive walks, evolving populations further in the same environment.  
88 We can then ask whether later adaptive mutations continue to show pleiotropic adaptation or  
89 not.

90  
91 One possibility is that pleiotropic adaptation is indeed common. This may be true if there are  
92 many pathways in the cell that can be mutated to yield simultaneous improvement of the traits  
93 under selection or, instead, if the signaling pathways mutated early can continue to be optimized  
94 beyond the first adaptive step. In this scenario, second-step adaptive mutations would continue  
95 to improve both traits under selection (Figure 1B, red points) and longer adaptive walks would  
96 also continue to show this pattern of pleiotropic adaptation (Figure 1B arrows).

97  
98 Alternatively, pleiotropic adaptation may be rare, and first-step mutations target the only (or one  
99 of few) signaling pathway(s) which can result in simultaneous improvement of multiple traits  
100 (performance in both fermentation and respiration growth phases in the case of the yeast  
101 evolution experiments). For adaptation to continue, it would need to engage the modules that  
102 can independently control the performance in each growth phase. Individual second-step  
103 mutations under this scenario would then be expected to exhibit a pattern of “modular  
104 adaptation”, improving only one performance under selection or the other (Figure 1C). The  
105 longer adaptive walks could continue down this route of specialization in either a single  
106 performance (blue or magenta arrows) or instead improve both performances under selection,  
107 but via sequential improvement of one performance and then the other (orange arrows).

108  
109 Thus, to characterize the nature of single-step adaptive mutations and whether the observation  
110 of pleiotropic adaptation of first-step mutations is a general feature of individual adaptation-  
111 driving mutations or instead a rare feature of early adaptive mutations, we need to  
112 experimentally conduct high-resolution adaptive walks, wherein we can isolate adaptive  
113 mutations, quantify their effects on traits relevant to fitness, and identify the molecular basis of  
114 adaptation. The yeast barcoding system developed by (Levy et al. 2015) is particularly well-  
115 suited for this set of experiments, as we can isolate hundreds of mutations per evolution  
116 experiment and study their properties via pooled fitness measurement experiments.

117  
118 In this study, we perform second-step evolution experiments using a set of five first-step  
119 adaptive mutations isolated from a glucose-limited evolution experiment (Levy et al. 2015) as  
120 new ancestors. We then isolate hundreds of mutants from these evolution experiments and  
121 measure their performance in the growth phases that make up the evolution condition. We find  
122 a shift in the nature of adaptation over this two-step adaptive walk. While first-step mutations

123 primarily demonstrate pleiotropic adaptation, improving performance in both growth phases  
124 under selection, second-step mutations instead primarily exhibit modular adaptation, improving  
125 performance in only a single growth phase under selection (Figure 1C). Whole genome  
126 sequencing reveals an associated shift in the molecular basis of adaptation: from first-step  
127 mutations in general signaling pathways to second-step mutations in genes related to  
128 mitochondrial function and respiration. Finally, we sample rare adaptive clones that showed  
129 patterns of adaptive pleiotropy and discovered that they harbor multiple additional mutations.  
130 This suggests that these populations have not yet reached physiological constraints but rather  
131 that adaptive walks may be constrained by genetic modules which prevent adaptive mutations  
132 from improving multiple performances in a single step.

133  
134 This shows that early adaptation, here represented by the first-step in our evolution experiment,  
135 can engage signaling pathways that allow for rapid, large step pleiotropic adaptation but later  
136 adaptation is more likely to be modular, as expected by theory. We thus expect that longer term  
137 evolution will indeed progress through smaller, and ultimately more modular, adaptive  
138 mutations.

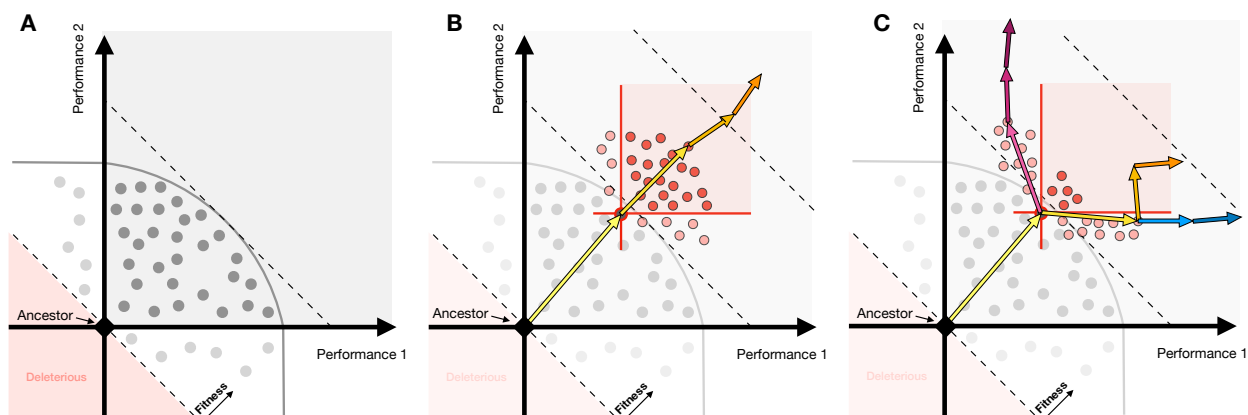

139  
140 **Figure 1. Theoretical illustration: Pleiotropy may be a generic feature of adaptation or specific to**  
141 **the first-step of evolution. (A)** First-step adaptive mutations (each mutation depicted as a dot) in  
142 evolution often exhibit patterns of pleiotropic adaptation - improving performance in multiple traits  
143 simultaneously (falling into the gray square). Gray curved line represents the limits of combinations of  
144 performances reached by the first-step of evolution. **(B)** If pleiotropic adaptation is common, then second-  
145 step adaptive mutations (depicted in red) would continue to improve multiple performances at once.  
146 Longer adaptive walks would also continue to show these patterns (orange arrows). **(C)** If pleiotropic  
147 adaptation is rare and largely constrained to the first adaptive step, then second-step adaptive mutations  
148 might show a shift in their improvement, instead primarily improving one performance or the other (light  
149 red circles). In this scenario, longer term adaptive walks may continue to specialize in one performance or  
150 the other (depicted by blue and magenta arrows), or instead continue to collectively improve both  
151 performances, albeit in a stepwise manner (orange arrows).

## 152 RESULTS

153

### 154 **Isolating second-step adaptive clones and measuring performance in growth phases**

155

156 When yeast are grown in an environment under glucose-limitation in batch culture, they  
157 experience several growth phases (Figure 2A). First, the yeast experience lag phase, where  
158 they acclimate to the environment and allocate cellular resources to consuming glucose. Then,  
159 the yeast ferment the glucose, converting it to ethanol. Once the glucose is consumed, the  
160 yeast then undergo the diauxic shift and respire on the ethanol they produced during  
161 fermentation. Finally, once the supply of ethanol has been depleted, the yeast experience  
162 stationary phase, where they allocate resources to surviving without a carbon source. These  
163 growth phases are typically thought of as independent processes, with distinct transcriptional,  
164 proteomic, and metabolomic profiles that characterize and drive yeast physiology (DeRisi, Iyer,  
165 and Brown 1997; Schlossarek et al. 2022; Zampar et al. 2013; Murphy et al. 2015).

166

167 Previously, a population of barcoded yeast was evolved in a 2-Day transfer environment under  
168 glucose limitation, where they experienced lag, fermentation, and respiration but not stationary  
169 phases before being transferred to fresh medium (Levy et al. 2015; Venkataram et al. 2016).  
170 Adaptive mutations isolated from this experiment gained substantial fitness benefits, primarily by  
171 constitutively activating one of two glucose-sensing pathways: Ras/PKA and TOR/Sch9  
172 (Venkataram et al. 2016). Additionally, 85% of these mutants improved performance in both  
173 fermentation and respiration phases, despite the supposed independence of these growth  
174 phases. Interestingly, with additional evolution experiments designed to maximize individual  
175 performances, Li et al (2019) were able to find evidence of constraints on the first step of  
176 evolution such that no single mutation is able to simultaneously maximize both fermentation and  
177 respiration performances to the largest extreme of each performance observed individually.

178

179 To understand whether pleiotropic adaptation is common or if instead first-step mutations  
180 represent rare solutions that improve both traits under selection, we carried out second-step  
181 evolution experiments in the same 2-Day transfer environment, isolated adaptive mutants,  
182 identified causative mutations underlying adaptation, and characterized the mutations' effects  
183 on performance in the environment's growth phases. Aggeli et al. (Aggeli, Li, and Sherlock  
184 2021) previously performed second-step evolution experiments using barcoded populations that  
185 carried one of three mutations identified in the first step of evolution: a gain-of-function mutation  
186 in *CYR1*, a loss-of-function mutation in *GPB2*, and a gain-of-function mutation in *TOR1*. Here,  
187 we used additional barcoded populations derived from two distinct mutations in *IRA1*: one  
188 missense mutation and one nonsense mutation (see Methods). We then evolved 2 replicates of  
189 each barcoded population in the 2-Day transfer condition, labeled here "Evo2D", for 22 transfers  
190 (~176 generations) and isolated adaptive clones (Figure 2B,C). As we were also interested in  
191 how the number of traits under selection alters the extent of pleiotropic adaptation, we also  
192 evolved the same barcoded populations in a 3-Day transfer condition, herein termed "Evo3D",  
193 where populations experienced an additional 12 hours of respiration and 12 hours of stationary

194 phase, and isolated adaptive clones from this additional set of evolution experiments (Figure  
195 2A-C; see Methods).

196  
197 To assess the extent to which physiological and genetic constraints affect the second-step of  
198 adaptation, we quantified each mutant's performance in fermentation, respiration, and stationary  
199 growth phases using pooled barcoded fitness assays, as developed previously (Figure 2B;  
200 (Venkataram et al. 2016; Y. Li et al. 2018; Y. Li, Petrov, and Sherlock 2019; Kinsler, Geiler-  
201 Samerotte, and Petrov 2020; Kinsler et al. 2023). Briefly, we pooled all isolated second-step  
202 mutants together with the barcoded mutants from the first step of evolution. We then mixed this  
203 pool of barcoded yeast with a set of barcoded neutral lineages and the ancestral strain, such  
204 that the barcoded pool started at either 2% or 5% frequency in the population and the neutral  
205 barcoded lineages collectively represented 2% of the population (see Methods). We then  
206 measured the fitness of each mutant by serially transferring  $\sim 5 \times 10^7$  cells for five cycles in 1-,  
207 2-, 3-, and 5-Day transfer intervals. At each transfer, we froze down the remaining cells,  
208 extracted their DNA, amplified the barcode region with PCR, and then sequenced the barcode  
209 region. We then calculated each mutant's fitness relative to the ancestor by comparing each  
210 mutant's frequency change with the pool of neutral lineages (Figure 2B, see Methods).

211  
212 During the analysis of fitness measurement data, we observed that the detected fitness effects  
213 of each mutant varied systematically over the course of serial transfers during the fitness  
214 measurement of the isolated adaptive clones. Specifically, in the 2-Day transfer condition, many  
215 adaptive mutants showed very high fitness when the ancestral strain was at or above 80% of  
216 the population but showed much lower fitness at later time intervals when the pool of adaptive  
217 lineages dominated the population. We note that this effect is not due to change in population  
218 mean fitness, as this is already accounted for in these fitness values. While intriguing, we  
219 avoided these frequency dependent fitness effects in our data by using only early timepoints,  
220 where the ancestor dominated the population, as these reflect the fitness in the environment set  
221 by the ancestor and where the fitness of mutants isolated from the original evolution experiment  
222 matched their fitness measurements in previous experiments (Figure S1).

223  
224 **Second-step adaptive mutations provide substantial yet smaller fitness benefits than**  
225 **first-step mutations**

226  
227 We sequenced the barcodes in these populations to monitor the dynamics of evolution and to  
228 quantify the distribution of fitness effects. Using the approach implemented in software FitMut1  
229 (Levy et al. 2015; F. Li, Tarkington, and Sherlock 2023), we quantified the distribution of fitness  
230 effects for these populations and the original evolution experiment. Because auto-diploidization  
231 is a common mode of adaptation in evolution experiments with haploid yeast, we also used a  
232 benomyl assay to determine the ploidy of the isolated adaptive clones (Figure 2C). We then  
233 categorized mutants according to their ploidy status and fitness across pooled fitness  
234 measurement experiments as neutral haploids, pure diploids, adaptive haploids, or high-fitness  
235 diploids (diploids that have additional beneficial mutations, see Methods).

236 We found that the rate of beneficial mutations is reduced in the second-step of evolution in the  
237 2-Day environment, with adaptive mutations that provide fitness benefits of 1.0 or greater (per  
238 cycle) becoming much rarer (Figure 2D). This is consistent with the patterns of diminishing  
239 returns epistasis commonly observed in microbial evolution experiments (Wiser, Ribeck, and  
240 Lenski 2013; Johnson et al. 2021; Aggeli, Li, and Sherlock 2021; Good and Desai 2015;  
241 Wünsche et al. 2017; Chou et al. 2011; Kryazhimskiy et al. 2014). While we see this general  
242 decrease in the magnitude of the fitness benefit of adaptive mutations, we nonetheless find that  
243 many second-step adaptive mutations still have substantial fitness gains in the 2-Day transfer  
244 evolution condition. Across all isolated second-step adaptive mutants (excluding auto-diploids  
245 and neutral haploids), the average fitness benefit provided is 82% per cycle relative to the  
246 parental strain. This is similar across mutants isolated from both 2- and 3-Day evolution  
247 experiments (Figure 2E,F). We also sampled rare mutants with fitness advantages as high as or  
248 even higher than the most extreme fitnesses observed in the first step of evolution. For  
249 example, two mutants isolated from the Evo3D *IRA1-missense* evolution experiments provide a  
250 benefit of ~200% above the parental *IRA1-missense* strain, which corresponds to a ~350%  
251 fitness advantage per 2-Day cycle over the original ancestor strain (Figure 2E,F). As will be  
252 discussed later, these extremely fit mutants represent rare and complex mutations, sometimes  
253 consisting of up to four distinct adaptive mutations.

254  
255 We also calculated the relative fitness improvement provided by auto-diploidization alone by  
256 comparing the fitness of the pure diploid population to the neutral haploids for each parental  
257 strain. Consistent with the pattern of diminishing epistasis observed from the evolution  
258 trajectories, we find that the fitness benefit of auto-diploidization has decreased in the second  
259 step of evolution from 95% per cycle in the first-step of evolution to 63% on average across all  
260 second-step auto-diploids (Figure 2F). However, this number varied by parental strain, with  
261 *TOR1* auto-diploids providing the largest fitness benefit of 81% per cycle and auto-diploids of  
262 *Ras/PKA* parental strains providing fitness benefits of 55%, 48%, and 52% per cycle to *CYR1*,  
263 *GPB2*, and *IRA1-missense*, respectively (Figure 2F). Surprisingly, we did not isolate any auto-  
264 diploids from the *IRA1-nonsense* evolution experiments. We suspect this could be due to  
265 differences in the fitness benefit provided by auto-diploidization to *IRA1-nonsense* strains  
266 compared to other beneficial mutations in the same evolving population or reduced auto-  
267 diploidization rate in this genetic background.

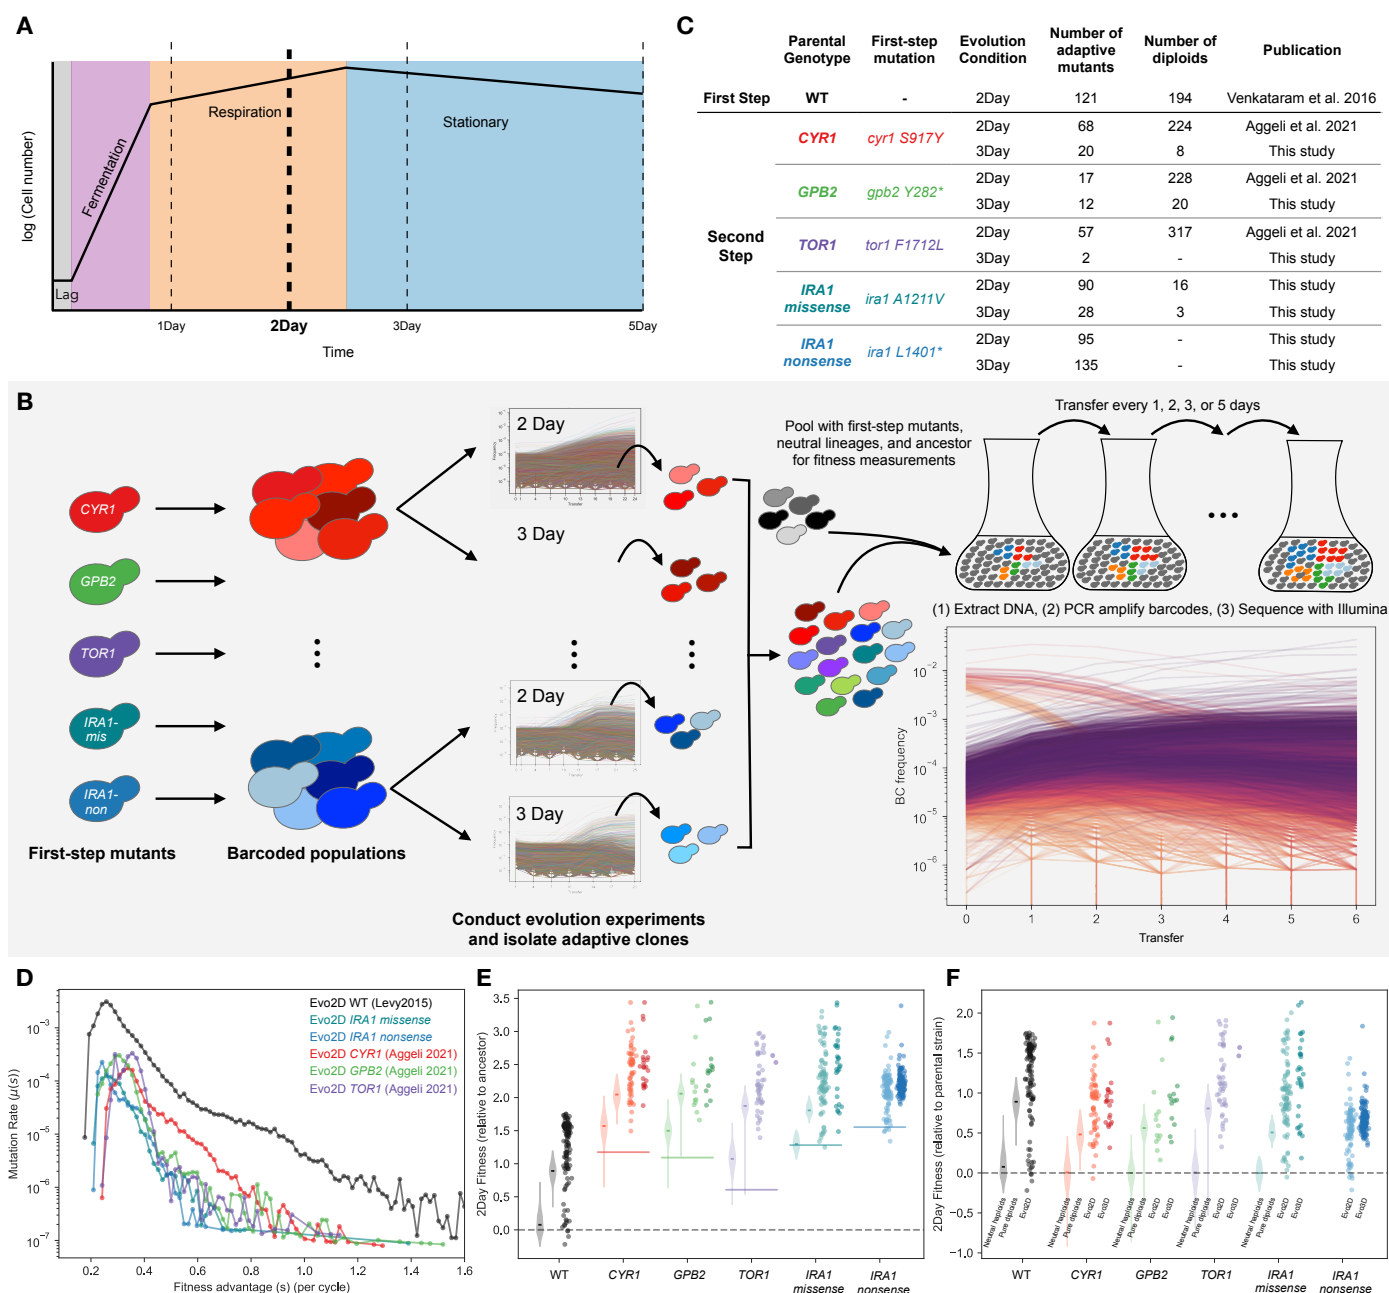

268 **Figure 2. Summary of experiments and fitness effects of isolated adaptive mutants.** (A) A  
 269 schematic of yeast growth phases under the nutrient conditions used in this study. The yeast experience  
 270 4 hours of lag phase, 16 hours of fermentation and 4 hours of respiration phase in the first 24 hours of  
 271 growth. (B) Schematic of barcoded evolution experiments and fitness measurement experiments. (C)  
 272 Table of mutants used in this study, including ploidy, and publication source. (D) Probability density of  
 273 mutational fitness coefficients. The black line refers to first-step mutants from Levy et al 2015. Colored  
 274 lines depict the inferred density of fitness effects of mutations from second-step evolution experiments in  
 275 the 2Day transfer environment (Evo2D). (E) Fitness effects per cycle in 2-Day transfer of all mutants,  
 276 relative to WT ancestor. First violin plot for each parental strain shows neutral haploids. Second shows  
 277 pure diploids. Third column is all other 2-Day adaptive mutants, including adaptive haploids and high-  
 278 fitness diploids. Fourth column is all other 3-Day adaptive mutants. (F) As in (E), but relative to parental  
 279 strain.



## 280 **Second-step adaptive clones demonstrate a shift from pleiotropic to modular adaptation**

281  
282 Next, to determine whether the pattern of pleiotropic adaptation observed over the first-step of  
283 evolution is maintained in the second step, we compared changes in performance for each  
284 mutant to its parental strain. To calculate each mutant's performance in fermentation,  
285 respiration, and stationary phases, we leveraged differences in each mutant's fitness in  
286 experiments of different transfer lengths, which was previously shown to be a good proxy for the  
287 direct performance in each growth phase (Y. Li et al. 2018; Y. Li, Petrov, and Sherlock 2019). In  
288 particular, a mutant's respiration performance per hour was calculated as the difference  
289 between its 2-Day fitness and 1-Day fitness, divided by the 24 hours in respiration phase  
290 experienced over the second day (Figure 3A). We then used this respiration performance to  
291 extrapolate the mutant's relative fitness at 20 hours, the time at which the population undergoes  
292 the diauxic shift from fermentation metabolism to respiration metabolism, with which we can  
293 calculate its fermentation performance per hour (Figure 3A). Finally, we calculated a mutant's  
294 stationary performance by taking the difference between 5- and 3-Day fitness and dividing it by  
295 the 48 hours of stationary phase experienced over these two days (Figure 3A). Importantly, the  
296 growth phase performances calculated here reflect compound measurements of several  
297 parameters important to fitness during and between growth phases, including energy  
298 metabolism, sensing of changing nutrient gradients, and survival.

299  
300 We found that while 85% ( $\pm 3\%$ ) of isolated first-step adaptive mutants improved performance in  
301 both fermentation and respiration phases (black points within gray square in Figure 3B), only  
302 35% ( $\pm 1\%$ ) ( $p < 0.001$ , re-sampling test) of isolated second step adaptive haploids evolved in the  
303 same 2-Day transfer environment improved performance over their first-step parental strain in  
304 both phases (light orange points within gray square in Figure 3B). Second-step mutants that  
305 were isolated from Evo3D, which encompasses the growth phases of Evo2D, show an even  
306 stronger shift from adaptive pleiotropy than the second-step mutants from the Evo2D, with only  
307 13% ( $\pm 1\%$ ) of these mutants improving performances in both fermentation and respiration  
308 (darker colored points labeled "Evo3D" in Figure 3B, C). This shift is also seen for each parental  
309 strain individually (Figure 3C), with Evo2D second-step mutants isolated from each first-step  
310 parental strain showing a reduction in the number of mutations that improve performance in  
311 both fermentation and respiration, albeit with some variability in magnitude. For example, only  
312 25% ( $\pm 2\%$ ) and 17% ( $\pm 2\%$ ) of second-step Evo2D mutants from *IRA1-missense* and *IRA1-*  
313 *nonsense* parental strains, respectively, improved both fermentation and respiration  
314 performances (Figure 3C). At the same time 51% ( $\pm 4\%$ ), 65% ( $\pm 10\%$ ), and 65% ( $\pm 5\%$ ) of  
315 second-step Evo2D mutations improve both fermentation and respiration performances from  
316 *CYR1*, *GPB2*, and *TOR1*. Thus while the second step adaptive mutations are still capable of  
317 improving fermentation and respiration performances at the same time, the probability of  
318 mutations being pleiotropically adaptive is lower.

319  
320 In addition to a reduction in the number of second-step mutations that improve performance in  
321 both fermentation and respiration phases, we noticed that second-step mutants were much

322 more likely to improve respiration performance than fermentation performance. Across all  
323 second-step Evo2D mutants, 98% ( $\pm 1\%$ ) improved respiration performance. 61% ( $\pm 1\%$ ) of  
324 these mutants improved respiration at the cost to fermentation performance (Figure 3B). This  
325 effect is even stronger for Evo3D mutants, where 86% ( $\pm 1\%$ ) improve respiration at a cost to  
326 fermentation performance (Figure 3B). This trend holds across most parental strains, with the  
327 strongest pattern seen for mutants evolved from the *IRA1-nonsense* parental strain, where 81%  
328 ( $\pm 2\%$ ) of Evo2D mutants and 96% ( $\pm 2\%$ ) of Evo3D mutants improved respiration performance  
329 at the cost of fermentation performance. Note that while many of these mutants reduce  
330 fermentation performance from the initial first-step parental strains, only a small number of  
331 mutants have fermentation performances worse than the original ancestor strain (Figure 3C,  
332 vertical black dashed line in each subplot).

333  
334 At the same time, improving performance in only the fermentation phase is rare. Only 2% of  
335 second-step Evo2D mutants and no isolated second-step Evo3D mutants improve fermentation  
336 alone, despite the fact that an equivalent improvement in fermentation performance would result  
337 in similarly high fitnesses for those mutants in the 2-Day condition these populations were  
338 evolved in (see fitness isoclines in Figure 3C).

339  
340 Despite these general patterns revealing a shift from pleiotropic to modular adaptation, there are  
341 several examples of very strongly adaptive clones which improve both performances. For  
342 example, one clone isolated from the *IRA1-missense* population has a fitness advantage of  
343 340% per cycle relative to the initial ancestor (or 210% relative to the *IRA1-missense* parental  
344 strain). This mutant does improve performance in both fermentation and respiration growth  
345 phases, albeit with most of its fitness gain coming from respiration (Figure 3C, *IRA1-missense*  
346 panel, labeled with red arrow). We isolated other rare examples of very fit clones that improve  
347 both growth phases from other parental strains (Figure 3C, *IRA1-nonsense* panel, labeled with  
348 red arrows), suggesting that the yeast have not yet reached functional constraints on the ability  
349 to improve both fermentation and respiration performance and that it is still possible to improve  
350 both performances beyond the evolutionary constraints observed for the first step of adaptation.  
351 As discussed below, some of these very fit clones have acquired third or fourth adaptive steps,  
352 allowing them to achieve these high fitnesses.

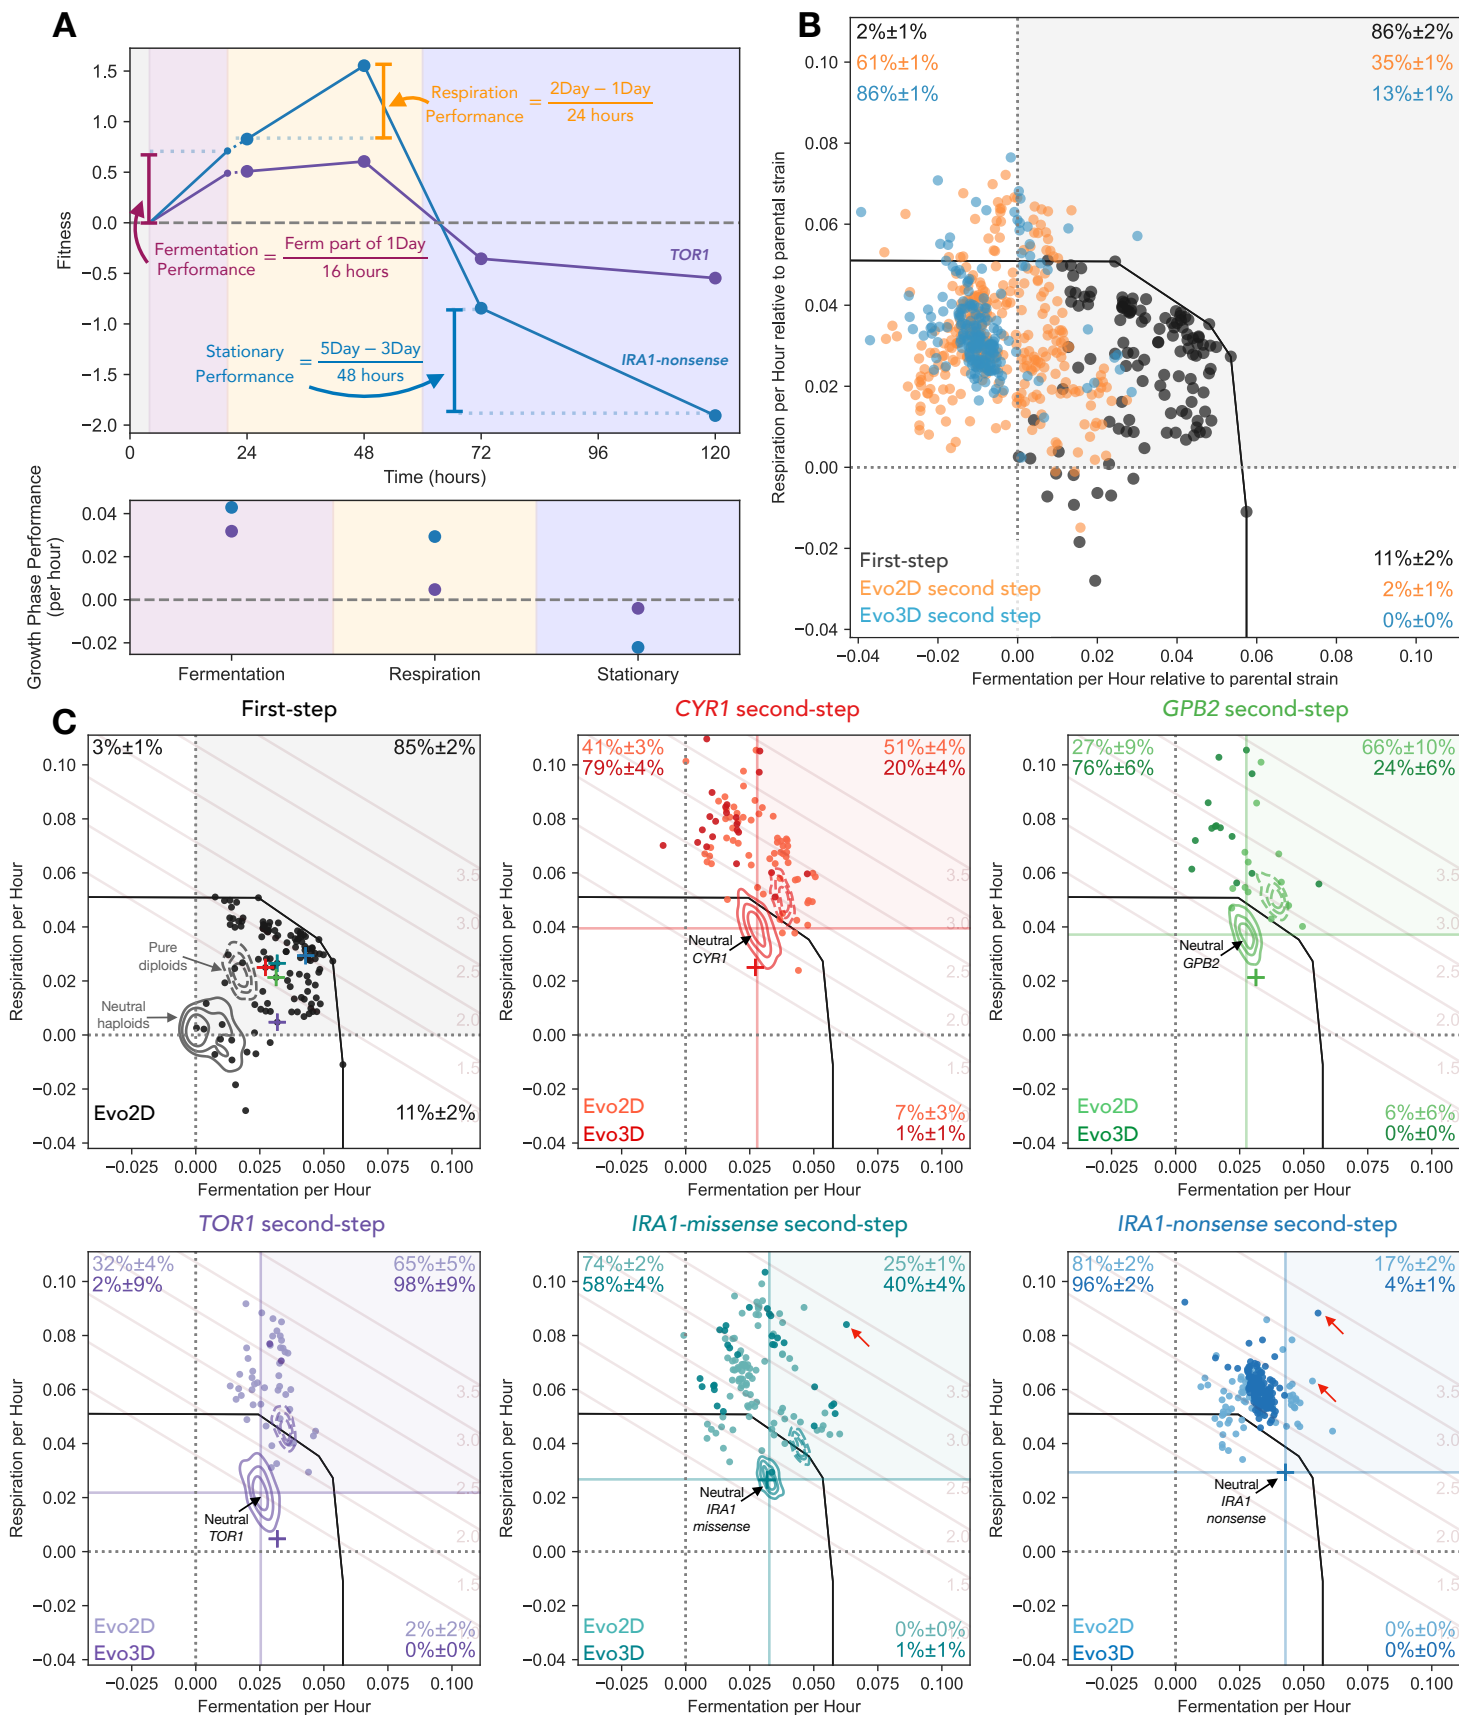

354 **Figure 3. Second-step adaptive mutants tend to improve respiration performance and not**  
355 **fermentation performance. (A)** Performance calculation in each growth phase. Respiration performance  
356 (per hour) is calculated as the difference between a mutant's 2-Day and 1-Day fitness, divided by 24  
357 hours. To calculate fermentation performance (per hour), we remove four hours of 1-Day fitness that is  
358 due to the mutant's respiration benefit. The remaining fitness is then divided by 16 hours of fermentation  
359 phase. Stationary phase performance (per hour) is calculated as the difference between 5- and 3-Day  
360 fitness divided by 48 hours. Example fitnesses and performances are shown for the *TOR1* and *IRA1-*  
361 *nonsense* mutations used as parental strains for the second-step of evolution. **(B)** Comparison of  
362 changes in performances from first- to second-step mutants relative to each parental strain. Note that  
363 first-step mutants are shown relative to the initial ancestor (the same as their measured fitness). Second-  
364 step mutants are shown relative to the relevant parental strain (i.e. second-step mutants from *IRA1-*  
365 *missense* are shown relative to neutral *IRA1-missense* parental lineages). Percentages in corners  
366 indicate estimated fraction of mutants in each quadrant as determined by re-sampling of mutants with  
367 fitness measurement error. **(C)** Performance of isolated mutants separated by parental strain. Each  
368 mutant's performance in fermentation and respiration growth phases is shown, separated into subfigures  
369 by the initial ancestor for each mutant. KDE estimates represent the density of neutral haploids (solid  
370 lines) and pure diploids (dashed lines) for each ancestor. Crosses represent the barcoded mutants  
371 carrying the first-step mutation from the initial evolution experiment. Black line depicts a convex hull of the  
372 most extreme first-step mutants. Fitness isoclines show the 2-Day fitness advantage per cycle relative to  
373 ancestral strain associated with each location in the performance space.

### 374 **Adaptively modular second-step mutants are more likely to improve performance in** 375 **stationary phase**

376  
377 We next asked how the shift from adaptive pleiotropy to adaptive modularity of performances  
378 under selection affects how these mutants perform in other tasks not under selection in the  
379 Evo2D environment. For example, Li et al (2018) (Y. Li et al. 2018) showed that many of the  
380 first-step mutations, which tended to improve both fermentation and respiration performances,  
381 exhibited costs in stationary phase performance. Does the shift towards adaptive modularity  
382 reduce the likelihood or magnitude of costs in other performances, potentially indicating that  
383 these mutants are more modular overall? Or do these costs to other performances remain?  
384

385  
386 To address these questions, we calculated each mutant's performance in stationary phase  
387 (Figure 2A). As previously described (Y. Li et al. 2018), first-step mutants are more likely to  
388 incur a cost in stationary phase than to improve it (Figure 4A), with 30% (36/119) of mutants  
389 showing such a cost (Figure 4B) and less than 2% (2/119) showing any improvement in  
390 stationary performance. The most fit first-step mutants which improve both fermentation and  
391 respiration performance to substantial degrees tend to have larger costs in the stationary phase.  
392 In particular, the *IRA1*-nonsense mutants, which were the most fit in the first-step, have the  
393 strongest costs in stationary phase performance, up to -4% per hour (Figure 4A).

394  
395 We find that many Evo2D second-step mutants do pay a cost in stationary phase. In particular,  
396 42% of second-step Evo2D adaptive mutants have lower stationary performance than their  
397 parental strain. At the same time, these costs to stationary performance tend to be somewhat

398 minor, exhibiting costs of less than -2% per hour for second-step mutants derived from *CYR1*,  
399 *GPB2*, *TOR1*, or *IRA1*-missense parental strains (Figure 4B). Note that this was not the case for  
400 the second-step mutants isolated from *IRA1*-nonsense populations, which exhibited the  
401 strongest costs to stationary phase in the first-step of evolution. These second-step mutants had  
402 further costs to stationary performance as extreme as -10% per hour (see supplemental figures  
403 S3 and S4).

404  
405 However, in contrast to the first-step of evolution where stationary performance was rarely  
406 improved, 25% (77/306) of second-step Evo2D mutants show an increase in stationary  
407 performance (Figure 4A). We further stratified the second-step mutants based on their  
408 combined fermentation and respiration performances. Specifically, we asked whether mutants  
409 that only improve respiration performance showed behavior in stationary phase that was distinct  
410 from those that improved both fermentation and respiration performance. We find that second-  
411 step Evo2D mutants that only improved respiration performance had varied effects on stationary  
412 performance, with 36% (70/197) showing increased stationary performance and 39% (76/197)  
413 showing a cost to stationary performance. By contrast, second-step Evo2D mutants that  
414 improved both fermentation and respiration performances were much less likely to improve  
415 stationary performance, with only 6% (7/109;  $p < 1e-8$  compared to by respiration-only improvers  
416 by Fisher's exact test) of these mutants showing stationary improvement and 49% (53/109)  
417 imposing a cost on yeast's ability to survive stationary phase.

418  
419 Thus, it appears that mutations that are capable of improving both fermentation and respiration  
420 at the same time are more likely to incur costs in stationary phase. This inherent relationship  
421 may explain the reduction in Evo3D mutants that improve both fermentation and respiration  
422 performances (Figure 3B, 4A), as stationary phase is additionally under selection in this  
423 condition. Indeed, 79% (160/202;  $p < 1e-8$  compared to Evo2D by Fisher's exact test) of Evo3D  
424 mutants show an improvement in stationary phase, 97% (155/160) of which do not improve  
425 fermentation. While 7% (15/202) of Evo3D mutants do exhibit a cost in stationary phase, these  
426 costs are relatively minor and are primarily found in mutants with combined fermentation and  
427 respiration performances that compensate for these costs to stationary performance (Figure 4A  
428 and B). These data indicate that the shift from mutants that improve both fermentation and  
429 respiration performances to those that primarily improve respiration performance is  
430 accompanied by a change in stationary phase performance. This pattern is true even when the  
431 other performance (stationary phase) is not under selection, as is in the case of Evo2D,  
432 suggesting that the pleiotropic "side effects" - that is phenotypic effects of mutations that are not  
433 primarily under selection (Kinsler, Geiler-Samerotte, and Petrov 2020) - of these second-step  
434 mutants may differ more generally from those of the first-step mutants.

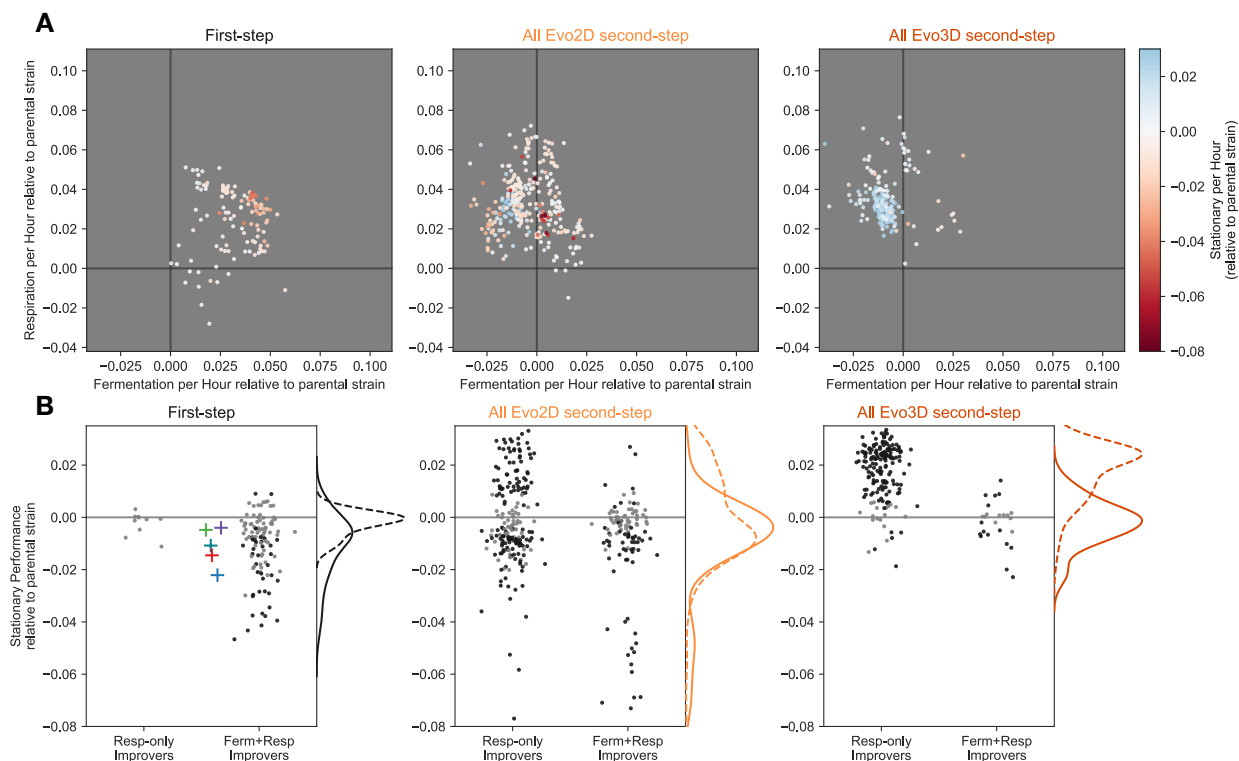

435  
436 **Figure 4. Mutations that improve respiration performance only exhibit less extreme costs in stationary phase**  
437 **compared to those that improve fermentation and respiration performances. (A)** Each panel depicts mutant  
438 performance relative to their parental strain, colored by the relative stationary phase performance of the parental  
439 strain (see color bar). The first panel shows all first-step mutants. The second and third panels depict second-step  
440 mutants isolated from Evo2D and Evo3D conditions, respectively. **(B)** Each panel shows the stationary performance  
441 relative to the mutants' respective parental strains. Mutants are split according to the effect on fermentation and  
442 respiration performances. Those which improve both fermentation and respiration are categorized as "Ferm+Resp  
443 Improvers" and all other mutants are categorized as "Resp-only improvers". Black points represent those with  
444 measurement error that does not overlap 0. Gray points have measurement error that show no significant change in  
445 stationary performance relative to the parental strain. Panels are organized as in (A). Kernel density estimates show  
446 the relative density for respiration-only improvers (dashed line) and fermentation and respiration-improving mutants  
447 (solid line).  
448

449 **Changes in selection pressure and physiological limitations do not explain the shift**  
450 **towards modular adaptation**  
451

452 Thus far, we have shown that there is a general shift in the effect that adaptive mutations have  
453 on performance in growth phases over the course of a two-step adaptive walk. In particular, we  
454 find that while first-step mutations exhibit adaptive pleiotropy, improving both fermentation and  
455 respiration performances, second-step mutations isolated from the same Evo2D environment  
456 tend to be adaptively modular, improving only respiration performance and often at the cost to  
457 fermentation performance. What could be driving this shift? There are three primary possibilities  
458 for this observation. One possibility is that, while care was taken to ensure the evolution  
459 condition was as consistent as possible to the first step of evolution, the selection pressure in

460 the second-step evolution experiments was shifted to favor respiration performance more than  
461 fermentation performance. A second possibility is that the populations have reached  
462 physiological limits on the yeast's ability to ferment glucose, such that there is more room to  
463 improve respiration performance. Finally, it could be that genetic and signaling pathways are  
464 wired such that there are only a limited number of mutational targets available to further improve  
465 both fermentation and respiration performances in the second-step of evolution.

466  
467 The first possible explanation for the shift towards modular adaptation is that the second-step of  
468 evolution was accompanied by a change in the relative contribution of fermentation and  
469 respiration growth phases to fitness in the 2-Day transfer condition. While we took care to  
470 ensure that the population sizes, transfer times, media conditions, and other details were  
471 identical to the conditions used in the first-step evolution experiment, it could be possible that  
472 differences remain. For example, the identity of the strain comprising the majority of the  
473 population in second-step evolution experiments may have shifted the selection pressures to  
474 increase the importance of respiration performance compared to the first step of evolution. To  
475 test whether there was such a shift, we compared the fitness effects of mutations in the  
476 evolution experiment itself with our fitness measurement experiments, which more closely mimic  
477 the first-step evolution experiments because the ancestral strain comprises the majority of the  
478 population. Specifically, we calculated the partial correlation between respiration performance  
479 and fitness during the evolution experiment, accounting for the fitness inferred from our fitness  
480 measurement experiments. If respiration performance contributes more to evolution fitness than  
481 expected from our fitness measurement experiments, we would expect a positive partial  
482 correlation after this adjustment. However, this is not the case ( $r=-0.02$ ,  $p=0.74$ ), indicating that  
483 the shift from pleiotropic to modular adaptation is not due to a change in selection pressure (see  
484 Methods, Differences in selection pressure do not drive shift towards modular adaptation).

485  
486 The second possible explanation for the shift towards modular adaptation is that the yeast have  
487 reached physiological limits on the ability to improve fermentation performance. To test whether  
488 yeast have reached the upper limits of fermentation performance, we performed additional  
489 evolution experiments in a 1-Day transfer environment, which primarily selects for fermentation  
490 performance. From these experiments, we isolated at least one second-step mutation from the  
491 *IRA1*-nonsense population that improved fermentation performance above the highest  
492 fermentation performances achieved by first- or second-step mutations evolved in the 2-Day  
493 and 3-Day environments (see Fig S2). This suggests that while a fermentation performance  
494 maximum has not yet been reached, the pre-existing wiring of genetic and signaling pathways  
495 may be such that it is much easier to find mutations that improve respiration performance at the  
496 cost of fermentation performance than it is to find mutations that improve both fermentation and  
497 respiration performances or even fermentation performance at the cost to respiration  
498 performance.

499 **Second step adaptive mutations reveal a shift from mutational targets in general nutrient-**  
500 **sensing pathways to specific processes involved in mitochondrial function**

501  
502 To better understand these patterns of pleiotropy and to identify the genetic basis of adaptation  
503 in these environments, we performed whole-genome sequencing on 324 adaptive mutants and  
504 called variants (see Methods). To identify the likely adaptive mutations, we compared the genes  
505 across all isolated mutants from all evolution experiments and labeled genes that were hit more  
506 than three times across all mutants as putatively causal. After identifying pathways that were  
507 recurrently targeted, we further identified genes belonging to the same pathways and called  
508 these as putatively causal as well.

509  
510 From this whole-genome sequencing, we found some adaptive targets in nutrient-sensing  
511 pathways that were previously identified in the first-step of evolution. The first-step of adaptation  
512 typically involved mutations in one of two signaling pathways responsible for sensing glucose  
513 and instructing the cells to grow: the Ras/PKA and TOR/Sch9 pathway (Venkataram et al.  
514 2016), Table 1). Most of these mutations resulted in loss of function in negative regulators of the  
515 pathway or modification of function in positive regulators, ultimately driving constitutive  
516 activation of these pathways (Venkataram et al. 2016). In an analysis of the second-step of  
517 evolution for *TOR1*, *CYR1*, and *GPB2* mutants in the 2-Day environment, Aggeli et al (2021)  
518 identified Ras/PKA pathway mutations as an adaptive route for *TOR1* mutants and TOR/Sch9  
519 mutants as an adaptive route for *CYR1* and *GPB2* mutants. The additional sampling we've  
520 conducted here, including sequencing mutants isolated from the two *IRA1* populations under  
521 Evo2D and Evo3D, further confirm that TOR/Sch9 pathway mutations are commonly observed  
522 in the background of Ras/PKA mutants. In particular, we find that mutations in the gene *KSP1*, a  
523 PKA-activated kinase which inhibits autophagy via TORC1 (Umekawa and Klionsky 2012;  
524 Chang and Huh 2018), are common across all of the Ras/PKA parental strains (Table 1). These  
525 mutations were most commonly isolated from *IRA1*-nonsense populations, where 42% (32/77)  
526 of Evo2D mutants and 91% (30/33) of Evo3D mutants harbored a *KSP1* mutant. Unlike the  
527 TOR/Sch9 pathway mutants observed in the first-step of evolution, which putatively result in  
528 increased TORC1 activity, increased cell growth, and decreased autophagy (Wilson and Roach  
529 2002; Venkataram et al. 2016), many of the observed second-step *KSP1* mutations are loss-of-  
530 function. This indicates that these mutations may be acting in the opposite direction of first-step  
531 mutations in this pathway, potentially allowing for the up-regulation of TOR despite (or in  
532 compensation of) increased activation of PKA associated with the Ras/PKA mutants.

533  
534 Beyond mutations in nutrient-sensing signaling pathways commonly being observed in the first-  
535 step of adaptation, our sampling reveals a shift towards mutational targets related to  
536 mitochondrial function and respiration, which likely affect the respiration performance of mutants  
537 measured in our study (Table 1). In particular, we find that 36% (22/64) of adaptive mutants  
538 isolated from *IRA1*-missense populations in the 2-Day evolution condition acquire mutations in  
539 or near genes involved in the TCA cycle (*CIT1*, *KGD1*, *MDH1*, *MAE1*, *ALD5*). Interestingly, all of  
540 these mutations are either missense or putatively regulatory mutations in enzymes directly



541 responsible for respiration, suggesting they may modify the function or expression of these  
542 enzymes, potentially changing respiratory flux (Suissa, Suda, and Schatz 1984; Kurita and  
543 Nishida 1999; Navarro-Aviño et al. 1999; Repetto and Tzagoloff 1989; Ait-EI-Mkadem et al.  
544 2017; Reinders et al. 2007; McAlister-Henn and Thompson 1987; Boles Eckhard, de Jong-  
545 Gubbels Patricia, and Pronk Jack T. 1998). In addition, we identified mutations in several genes  
546 related to the regulation of respiration and mitochondrial function, with 25% (16/64) of isolated  
547 2-Day *IRA1*-missense mutants identified as carrying a mutation in the RTG pathway, which is  
548 responsible for the regulation of genes important for respiration. In particular, we observe  
549 putative loss-of-function mutations in *MKS1*, a negative regulator of the RTG pathway, and  
550 missense mutations in *RTG2*, a positive regulator of the pathway (Liu et al. 2003; Liao and  
551 Butow 1993; Komeili et al. 2000; T. Sekito, Thornton, and Butow 2000; Takayuki Sekito et al.  
552 2002). This suggests that these mutations may be up-regulating the RTG pathway and the  
553 genes it regulates, indirectly increasing metabolic flux through the TCA cycle. Moreover, 19%  
554 (12/64) of these mutants carry a mutation in other genes related to the regulation of  
555 mitochondrial biogenesis (*PUF3*, *PAB1*, *PAN1*, *PAN2*, *AIM17*), many of which are related to  
556 post-transcriptional modification of mRNA molecules related to mitochondrial function or  
557 respiration (Chaithanya and Sinha 2023; C.-D. Lee and Tu 2015; Lapointe et al. 2018).

558  
559 These patterns are also observed in other populations harboring different first-step mutants. In  
560 particular, while our sampling for *IRA1-nonsense* and *IRA1-missense* populations allowed us to  
561 detect the largest number of mutational targets, mutations in genes involved in the TCA cycle,  
562 RTG pathway, and mitochondrial biogenesis were found in populations from nearly all first-step  
563 mutations, with a few exceptions. These exceptions, for example the absence of HOG-pathway  
564 mutations from *IRA1-missense* and *IRA1-nonsense* backgrounds, is suggestive of historical  
565 contingency, where the identity of further mutations is dependent on mutations acquired earlier  
566 in evolution (Blount, Borland, and Lenski 2008; Harms and Thornton 2014; Park, Metzger, and  
567 Thornton 2022; Bakerlee et al. 2021). While some of these genes were detected in previous  
568 work (Aggeli, Li, and Sherlock 2021), additional sampling from new evolution experiments in the  
569 3-Day condition and additional parental strains (*IRA1-missense* and *IRA1-nonsense*) allowed us  
570 to more confidently identify recurrently mutated genes and to group the observed sets of  
571 mutations and genes into functional categories and pathways.

### 572 573 **Mutations isolated from the 3-Day evolution experiment are a subset of 2-Day adaptive** 574 **mutants**

575  
576 We next examined whether there was a difference in the mutational targets isolated from 2- and  
577 3-Day evolution experiments, given that we observed that Evo2D mutants were more likely to  
578 improve both fermentation and respiration performances than Evo3D mutants (Figure 3), and  
579 Evo3D mutants were more likely to improve stationary performance than Evo2D (Figure 4). In  
580 particular, we wondered whether the addition of stationary phase as a selective pressure  
581 allowed for new mutational targets to be adaptive because of their effect on stationary phase, or

582 if instead, the addition of stationary phase restricted the Evo3D mutational targets to a subset of  
583 the Evo2D mutations that were not costly to stationary performance.

584

585 By comparing the sets of mutated genes for well-sampled parental strains *IRA1-missense* and  
586 *IRA1-nonsense*, we saw that all genes mutated in the 3-Day evolution experiments were also  
587 identified in the 2-Day evolution experiments (see Table 1). In particular, *PUF3*, *PAB1*, and  
588 *MTH1* mutants are entirely absent as single mutations from the 3-Day *IRA1-nonsense*  
589 experiments, shifting the molecular targets to essentially just those in *KSP1*. Similarly, RTG and  
590 TCA cycle mutants are reduced in frequency or absent from the 3-Day *IRA1-missense*  
591 experiments, respectively. As expected, these mutations that are reduced in frequency show  
592 costs in stationary performance and thus have reduced fitness in the 3-Day transfer  
593 environment (Figs S7 and S8).

|                                        | WT    |       | TOR1  |       | GPB2  |       | CYR1  |       | IRA1-missense |       | IRA1-nonsense |       |                          |
|----------------------------------------|-------|-------|-------|-------|-------|-------|-------|-------|---------------|-------|---------------|-------|--------------------------|
|                                        | Evo2D | Evo3D | Evo2D | Evo3D | Evo2D | Evo3D | Evo2D | Evo3D | Evo2D         | Evo3D | Evo2D         | Evo3D |                          |
| Ras/PKA Pathway                        | IRA1  | 30/77 |       |       |       |       |       |       |               | 1/30* |               |       | Loss of function         |
|                                        | IRA2  | 11/77 | 1/21  |       |       |       |       |       |               |       |               |       | Loss of function         |
|                                        | GPB1  | 4/77  |       |       | 1/7*  |       |       |       |               |       |               |       | Modification of function |
|                                        | GPB2  | 14/77 | 2/21  |       |       |       |       |       |               |       |               |       | Loss of function         |
|                                        | PDE2  | 11/77 |       |       |       |       |       |       |               |       |               |       | Loss of function         |
|                                        | CYR1  | 3/77  |       |       |       |       |       |       |               |       |               |       | Modification of function |
|                                        | GPR1  |       |       |       |       |       | 1/27  |       |               |       |               |       | Modification of function |
|                                        | RAS2  | 1/77  | 1/21  |       |       |       |       |       |               |       |               |       | Modification of function |
|                                        | TFS1  | 1/77  |       |       |       |       |       |       |               |       |               |       | Modification of function |
| TOR/Sch9 Pathway                       | TOR1  | 1/77  |       |       |       |       |       |       |               |       |               |       | Modification of function |
|                                        | KOG1  | 1/77  |       |       |       |       |       |       |               |       |               |       | Modification of function |
|                                        | SCH9  |       |       |       | 1/7   |       |       |       |               |       |               |       | Modification of function |
|                                        | KSP1  |       |       |       | 1/7   | 1/8*  | 1/27  | 2/14  | 4/67          |       | 32/72         | 30/33 | Loss of function         |
| HOG Pathway                            | HOG1  |       |       |       |       |       | 1/27  |       |               |       |               |       | Modification of function |
|                                        | PBS2  |       | 6/21  |       |       |       |       |       |               |       |               |       | Modification of function |
|                                        | SSK2  |       | 7/21  |       | 1/7   | 1/8   | 1/27  |       |               |       |               |       | Loss of function         |
| RTG Pathway                            | RTG2  |       |       |       | 1/8   | 4/27  | 2/14  | 9/67  | 1/30          | 1/72  |               |       | Modification of function |
|                                        | MKS1  |       |       |       |       | 2/27  | 1/14  | 7/67  | 1/30*         |       |               |       | Loss of function         |
|                                        | BMH1  |       |       |       | 1/7*  |       | 1/27  |       |               |       |               |       | Modification of function |
| TCA cycle                              | CIT1  |       | 1/21  |       |       | 1/27  |       | 16/67 | 1/30          |       |               |       | Modification of function |
|                                        | KGD1  |       |       |       |       | 1/27  |       | 3/67  |               |       |               |       | Modification of function |
|                                        | MDH1  |       |       |       |       |       |       | 4/67  |               |       |               |       | Modification of function |
|                                        | MAE1  |       |       |       |       |       |       | 2/67  |               | 2/72* |               |       | Modification of function |
|                                        | ALD5  |       |       |       |       |       | 1/14  | 1/67* |               |       | 2/33*         |       | Modification of function |
| Regulation of Mitochondrial Biogenesis | PAB1  |       | 1/21  |       | 2/8   | 1/27  | 4/14  | 3/67  | 5/30          | 12/72 |               |       | Modification of function |
|                                        | PAN2  |       |       |       |       |       |       | 2/67  |               |       |               |       | Modification of function |
|                                        | PAN3  |       | 1/21  |       |       |       |       | 1/67  |               |       |               |       | Loss of function         |
|                                        | AIM17 |       |       |       | 1/8   |       |       | 2/67  |               |       |               |       | Loss of function         |
|                                        | PUF3  |       |       |       | 1/8   | 4/27  | 2/14  | 7/67  | 7/30          | 24/72 | 1/33*         |       | Loss of function         |
|                                        | MKT1  |       |       |       | 1/7   | 1/8   | 1/27  | 1/14  | 1/67          | 9/30  |               |       | Modification of function |
| Other                                  | GSH1  |       | 1/21  |       | 1/7   |       | 5/27  |       | 2/67          | 1/30  | 1/72*         |       | Modification of function |
|                                        | ARO80 |       |       |       |       |       | 3/27  | 1/14  | 3/67          | 4/30  |               |       | Loss of function         |

594 **Table 1. Identified mutations by ancestral genotype and evolution condition.** Boxes with gray text  
 595 and asterisks indicate genes mutated only in the context of other putatively causal mutants. The column  
 596 on the far right indicates the putative functional effect of the mutations on the gene. If any stop-gained or  
 597 frameshift mutations were identified in this gene, it was classified as harboring “loss of function”  
 598 mutations. If instead, only missense or nearby non-genic mutations were identified, the gene is classified  
 599 as “modification of function”.

600 **The exhaustion of mutational targets in nutrient-sensing signaling pathways drives the**  
601 **shift towards modular adaptation**

602  
603 To understand how the shift from pleiotropic to modular adaptation over the two-step adaptive  
604 walk is reflected on a molecular basis, we examined how each of these mutations moved the  
605 organisms in the performance space. The first step of evolution, which primarily hit mutational  
606 targets in the Ras/PKA pathway, shows strong patterns of pleiotropic adaptation, with these  
607 mutations improving both fermentation and respiration performances (Figure 5A).

608  
609 Of the second-step adaptive haploids, those with mutations in the Ras/PKA pathway (Figure 5B,  
610 blue circles), which were isolated primarily from the *TOR1* populations, also display pleiotropic  
611 adaptation, improving both fermentation and respiration performance. This suggests that  
612 mutations which putatively increase the activity of the Ras/PKA pathway are indeed generally  
613 adaptively pleiotropic.

614  
615 In addition to Ras/PKA mutations, other haploids with mutations in *ARO80* (Figure 5B, pink  
616 circles) and *GSH1* (Figure 5B, gold circles), show recurrent patterns of pleiotropic adaptation  
617 across parental strains, notably across *CYR1* and *IRA1*-missense genetic backgrounds (Figures  
618 S5 and S6). Mutations in these genes, which are involved in amino acid catabolism (Iraqi et al.  
619 1999; K. Lee and Hahn 2013) and glutathione biosynthesis (Kistler, Maier, and Eckardt-Schupp  
620 1990), respectively, may be adaptively pleiotropic due to their involvement in processes entirely  
621 orthogonal to, or upstream of, both fermentation and respiration.

622  
623 Many of the remaining mutational targets improve respiration performance at the cost of  
624 fermentation performance. In particular, haploid mutants which harbor mutations in genes  
625 involved in the TCA cycle (Figure 5B, green circles), mitochondrial biogenesis (orange, red  
626 circles), or the RTG pathway (brown circles) improve respiration performance at the cost to  
627 fermentation performance in *CYR1*, *GPB2*, *TOR1*, and *IRA1*-missense backgrounds when  
628 present (Figure 5). Notably, haploids that harbor mutations in these genes have similar fitness in  
629 the 2-Day transfer environment to mutants with mutations in *ARO80* and *GSH1*, which exhibit  
630 adaptive pleiotropy. Despite these similar fitnesses, there is an 8-fold increase in observed  
631 adaptively modular genetic targets than those that are adaptively pleiotropic in the *IRA1*-  
632 missense 2-Day evolution experiments (41 mutants in TCA and RTG with fitnesses between 2.0  
633 and 2.5 compared to 5 in *GSH1* and *ARO80* for *IRA1*-missense).

634  
635 There are also single point mutations in *MKT1* which achieve very high 2-Day fitness by greatly  
636 improving respiration performance and showing little cost to fermentation performance (Figure  
637 5B - chartreuse circles). Interestingly, all adaptive mutations in this gene occur at the same  
638 nucleotide, changing from 89A to C,G, or T. Thus, while these mutations are driven by only a  
639 single mutation, their lower frequency reflects the reduced target size compared to the other  
640 haploid mutations which have multiple targets within the gene (e.g., those in RTG pathway, TCA  
641 cycle, etc.). The 89A allele is a derived allele in the parental S288C yeast strain used for all of

642 these experiments and reflects an ancestral reversion in the case of A89G. This A89G reversion  
643 has been previously observed in other evolution experiments in glucose limitation and the 89G  
644 allele has been shown to stabilize mRNA of mitochondrial genes that are targets of Puf3  
645 (Chaithanya and Sinha 2023; Gupta et al. 2015). Interestingly, 89C and 89T alleles each  
646 provide similar fitness benefits as the 89G allele in our experiments despite resulting in distinct  
647 amino acids, suggesting that the 89A allele and the resulting aspartic acid may be particularly  
648 costly to *MKT1* function.

649  
650 Beyond adaptive mutations in haploids, auto-diploidization is a common mode of adaptation. In  
651 particular, we see that in addition to diploidy being adaptively pleiotropic by itself (pure diploids  
652 shown as topographical Kernel Density Estimates in Figure 5), high-fitness diploids that co-  
653 occur with other mutations (colored triangles in Figure 5) also show patterns of adaptive  
654 pleiotropy, improving both fermentation and respiration performances. This seemingly universal  
655 benefit without cost likely explains the high frequency of auto-diploidization observed across  
656 genetic backgrounds and environmental conditions in many yeast evolution experiments (Tung  
657 et al. 2021; Venkataram et al. 2016; Levy et al. 2015; Hong and Gresham 2014; Fisher et al.  
658 2018). While these high-fitness diploids provide a much larger benefit than haploids that harbor  
659 mutations in the same genes, their reduced frequency is likely due to a lower mutation rate, as  
660 these mutants needed to acquire both a mutation in an adaptive target and auto-diploidize,  
661 together improving respiration to a larger extent and mostly eliminating costs to fermentation  
662 performance associated with the mutation. Notably, most of the point mutations are  
663 homozygous, indicating they likely occurred before the auto-diploidization event.

664  
665 In addition to these general trends, we sampled a small number of mutations that have a total of  
666 three or four putatively causal mutations since the original ancestor. These mutants provide  
667 hints about how adaptation might proceed over longer adaptive walks. In one case, as  
668 demonstrated by the *IRA1*-nonsense + *KSP1* + *PUF3* mutant depicted in the second panel of  
669 Figure 5C, we observe adaptation as continuing down a route towards specialization in  
670 respiration performance. We also observe three examples where the collective effect of the  
671 mutations instead drives evolution towards generalism – improving both fermentation and  
672 respiration performance – despite being composed of second-, third-, and fourth-step mutations  
673 which tend to improve only one performance or the other. For instance, one *IRA1*-missense  
674 mutant acquired an *IRA1*-nonsense mutation, an *MKT1* A89G mutation which improves only  
675 respiration by itself in this background, and acquired a mutation in *SPB1* (Suppressor of *PAB1*),  
676 which is expected to improve only fermentation with a modest cost to respiration, assuming  
677 additive mutational effects in the performance space (Figure 5C, first panel). We see similar  
678 examples for two *IRA1*-nonsense mutants: one of which acquired both *KSP1* and *GSH1*  
679 mutations and the other of which acquired *KSP1* and *TAN1* mutations (Figure 5C, third and  
680 fourth panels), where the collective effects of the observed mutations ultimately continue to  
681 push the population towards improving both traits. These rare mutants demonstrate that, at  
682 least on short evolutionary timescales, navigation of the performance space seems to be more  
683 driven by constraints imposed by the genetic wiring of the cell, which influences the relative

684 ease of improving one performance or the other, rather than fundamental or physiological  
 685 constraints upon improving the performances themselves.  
 686

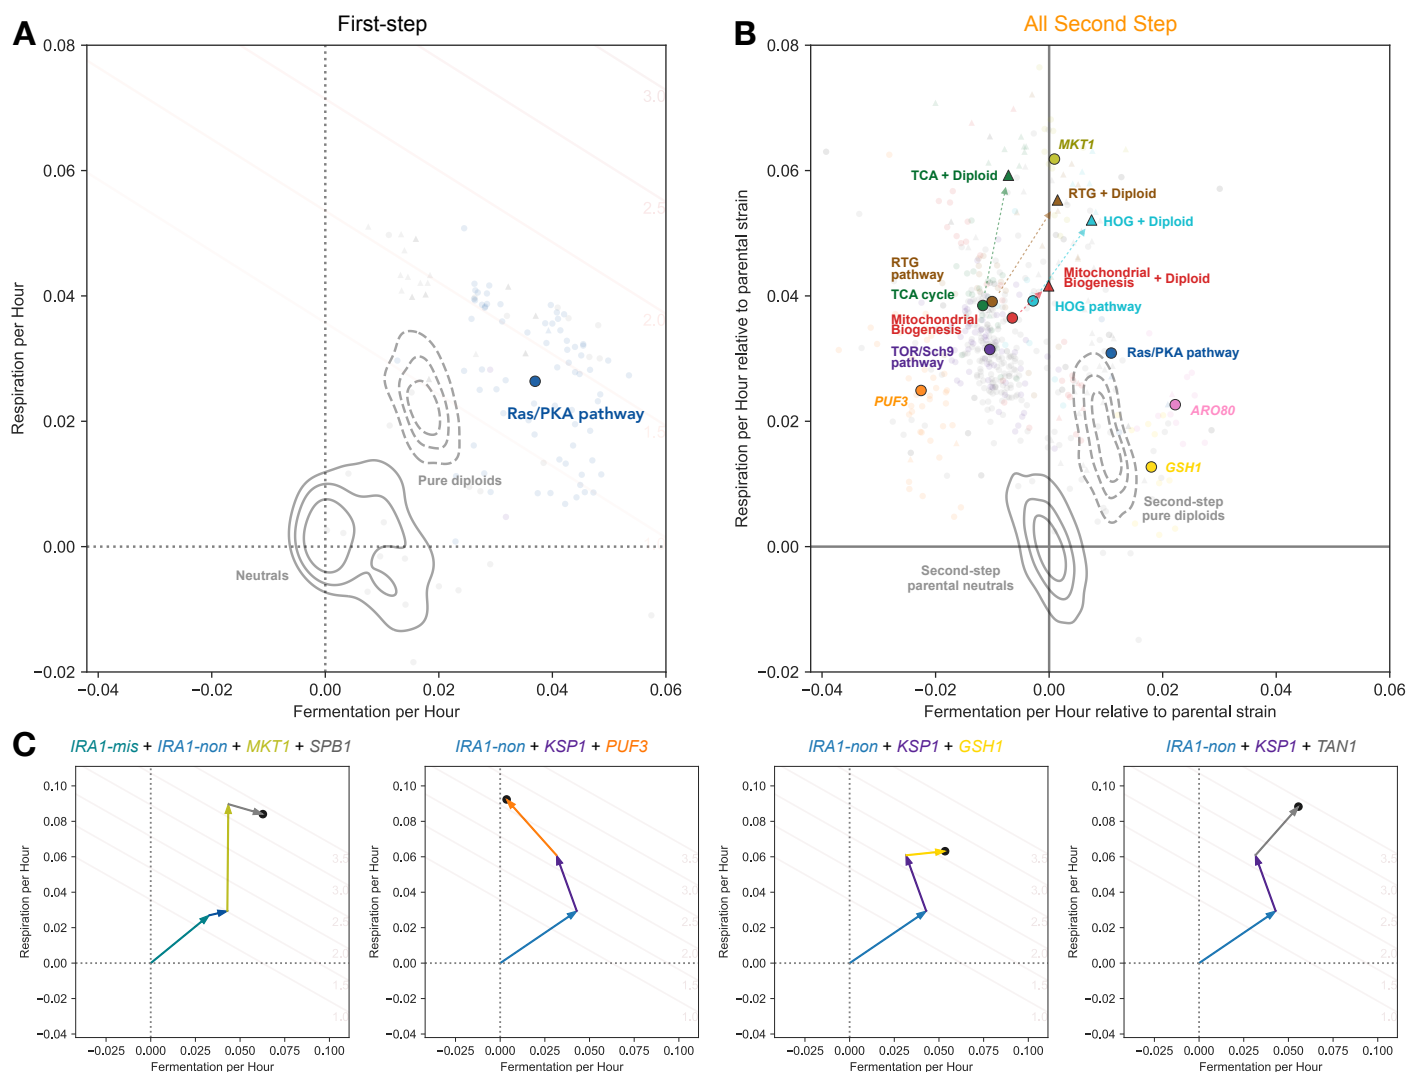

687 **Figure 5. Adaptive modularity is driven by the accessibility of mutational targets that improve**  
 688 **respiration at the cost of fermentation. (A)** Ras/PKA and TOR/Sch9 mutants from the first-step of  
 689 adaptation to improve both fermentation and respiration performance. **(B)** Most common second-step  
 690 mutational targets tend to improve respiration at the cost of fermentation (centroids depicted as colored  
 691 circles), except for rare Ras/PKA (blue), *ARO80* (pink), or *GSH1* (yellow) mutants; haploids shown as  
 692 circles. Auto-diploids exhibit adaptive pleiotropy (dashed KDE estimate for all parental strains, colored by  
 693 first-step mutation). Auto-diploidization is also adaptively pleiotropic on the background of other point  
 694 mutations (triangles colored by pathway or gene category). Note that only centroids for each category of  
 695 gene with at least 3 observed mutants were included. **(C)** Triple and quadruple mutants can ultimately  
 696 drive adaptation towards adaptive pleiotropy (or adaptive modularity) despite being primarily composed of  
 697 adaptively modular mutations. Note that the mutations beyond the first step are depicted in no particular  
 698 order in these subpanels.

## 699 DISCUSSION

700

701 In this study, we sought to understand the frequent observation that single adaptive mutations  
702 observed in experimental evolution, especially those of large effect, can pleiotropically improve  
703 multiple distinct performances at once. This observation is puzzling because theoretical work  
704 suggests that as pleiotropy increases, large effect adaptive mutations should become less  
705 probable. This expected “cost of complexity” is the reason for why modularity is often seen as  
706 the necessary condition and the expected consequence of evolution of complex organisms by  
707 natural selection (Orr 2000; Welch and Waxman 2003; Wagner and Zhang 2011; Wagner,  
708 Pavlicev, and Cheverud 2007; Wagner and Altenberg 1996; Melo et al. 2016; Hartwell et al.  
709 1999).

710

711 We focused on one striking example of pleiotropic adaptation that comes from previous studies  
712 of yeast evolving in a glucose-limited environment (Levy et al. 2015) in which 85% of the first-  
713 step single adaptive mutations improved performance in both fermentation and respiration  
714 growth phases (Fig1A, Fig3B) (Levy et al. 2015; Venkataram et al. 2016; Y. Li et al. 2018),  
715 despite these growth phases as being thought to be physiologically distinct.

716

717 Here, we investigated whether adaptation in the same low-glucose environment and 2-Day  
718 transfer as the original experiment (Levy et al. 2015) will continue following the path of adaptive  
719 pleiotropy (Fig. 1B) or will shift to become more modular (Fig. 1C). We thus further evolved 5  
720 different first-step mutants, four in the Ras/PKA pathway (*IRA1-nonsense*, *IRA1-missense*,  
721 *CYR1*, and *GPB2*) and one in the Tor/Sch9 pathway (*TOR1*), sampled a large number of  
722 adaptive mutants, and evaluated their effects on the fermentation and respiration performances.

723

724 In all five cases, the results were qualitatively similar. First, adaptation proceeded to improve  
725 fitness, albeit to a somewhat muted degree. Second, while a number of mutants were adaptively  
726 pleiotropic, improving both fermentation and respiration performances, the dominant trend  
727 switched towards more modular adaptation. Specifically, nearly all adaptive mutants improved  
728 respiration performance sharply and many had no or only weakly positive or even negative  
729 effects on the fermentation performance (Fig. 3B). These results support a model of adaptation  
730 wherein early adaptation is driven by mutations of large effect that improve multiple  
731 performances at once. Then, after these mutations have become exhausted, adaptation may  
732 proceed via more modest mutations that improve performances in a stepwise manner (Figure  
733 1C).

734

735 One remaining question is how pleiotropic adaptation is possible in the first place. The  
736 prevalence of the pleiotropic adaptation in the first step may be due to these mutations being  
737 primarily in Ras/PKA pathway genes. We thus hypothesized that the adaptive pleiotropy is a  
738 consequence of the way this pathway has evolved to shift rates of metabolism in both  
739 fermentation and respiration in a substantial, coordinated, and beneficial fashion (Wilson and  
740 Roach 2002). The notion is that even though these metabolic functions are distinct, they are

741 often required to be carried out in tandem, as respiration commonly follows fermentation for  
742 yeast. It is possible that sensing and signaling pathways such as the Ras/PKA pathway evolved  
743 to affect them together. This might be a general feature of signaling pathways as they must shift  
744 multiple functions and performances together and this ability then represents an attractive target  
745 for adaptive genetic changes.

746  
747 If pleiotropic adaptation is a feature of the Ras/PKA pathway, the prediction is that 2nd step  
748 adaptive Ras/PKA pathway mutations will remain adaptively pleiotropic. This is indeed the case.  
749 Second-step mutations in the Ras/PKA pathway, mainly arising in the *TOR1* background, do  
750 improve both fermentation and respiration performances. A small number of second-step  
751 adaptive mutations outside of this pathway, in *ARO80* and *GSH1*, are also pleiotropically  
752 adaptive and improve both respiration and fermentation, but to a smaller degree than Ras/PKA  
753 pathway mutants. This suggests that the Ras/PKA pathway is virtually unique in its ability to  
754 modulate both fermentation and respiration performances together to a substantial degree in an  
755 adaptive manner, a notion also supported by the fact that we observe the shift towards  
756 modularity adaptation already in the second adaptive step.

757  
758 A small number of adaptive clones in the second step improved both fermentation and  
759 respiration performances to a substantial degree. Sequencing of these clones showed that they  
760 acquired multiple mutations, and several of these clones improved both performances by the  
761 addition of two or more orthogonal steps. This suggests that adaptation can continue improving  
762 both performances but the adaptive walk needs to engage multiple modules and multiple  
763 mutations, making such adaptation slower than the first step of adaptation. This might be part of  
764 the reason why adaptation in general slows down over the course of evolution (Wiser, Ribeck,  
765 and Lenski 2013; Johnson et al. 2021; Good and Desai 2015; Aggeli, Li, and Sherlock 2021).

766  
767 We argue that signaling pathways such as Ras/PKA have the capacity of generating “coherent  
768 pleiotropy”, where the output of many cellular processes can be affected without disrupting the  
769 proper regulation and function of each process. As such, signaling pathways that have been  
770 evolutionarily pre-wired to control combinations of selective pressures may be easily modified  
771 by mutation to coherently improve the performances under selection. The ability of signaling  
772 pathways to generate coherent pleiotropy implies that many adaptive mutations should hit  
773 signaling pathways. Indeed, this is what we see. For example, in cancer, the key oncogenes are  
774 located along cellular signaling pathways and engage either receptors of signals or represent  
775 key relay stations in these pathways (Bailey et al. 2018; Sanchez-Vega et al. 2018; Pawson and  
776 Warner 2007; Sondka et al. 2018; Hanahan and Weinberg 2011; Hanahan 2022).

777  
778 On the other hand, this coherent pleiotropy of signaling pathways does not necessarily indicate  
779 that such mutations have no costs in other traits. Indeed, we see that many of the Ras/PKA  
780 mutants exhibit costs in stationary phase. Moreover, in previous work, we find that the Ras/PKA  
781 mutants have additional phenotypic effects with minor contributions to fitness in the Evo2D  
782 evolution condition but substantial effects in other conditions (Kinsler, Geiler-Samerotte, and



783 Petrov 2020). Thus, we might expect these signaling pathways to be most likely to be targeted  
784 by adaptation in relatively simple environments where the beneficial pleiotropic effects can be  
785 realized with only minor other costs.

786

787 In addition to cellular signaling pathways, other gene-regulatory, hormonal, and neuronal  
788 systems allow for organisms to be phenotypically plastic and involve coherent control of many  
789 traits of an organism. As such, these systems may also be attractive targets for evolutionary  
790 change, as they can serve as high-leverage routes for altering many traits simultaneously. The  
791 evolution of phenotypic plasticity hence paves the way for subsequent large-effect evolutionary  
792 shifts in local adaptation.

793

794 Finally, we believe that the existence of these high-leverage pleiotropic routes of adaptation  
795 must be incorporated into our thinking of the evolution of complex systems. Indeed, we  
796 commonly think of pleiotropy as purely random, with mutations shifting multiple traits at once in  
797 a random and thus largely incoherent way. This generates expectations that pleiotropy should  
798 be costly, as such incoherent shifts lead to a generically disorganized state. Given that actual  
799 organisms have low-dimensional but pleiotropic signaling and regulatory systems, pleiotropy  
800 can often be coherent and thus might often enhance adaptive potential and allow for surprisingly  
801 large-effect adaptive mutations. It is therefore important to think of regulation and adaptation as  
802 two sides of the same problem of how to change complex and tightly integrated systems in an  
803 adaptive manner.

## 804 REFERENCES

- 805 Aggeli, Dimitra, Yiping Li, and Gavin Sherlock. 2021. "Changes in the Distribution of Fitness Effects and  
806 Adaptive Mutational Spectra Following a Single First Step towards Adaptation." *Nature*  
807 *Communications* 12 (1): 5193. <https://doi.org/10.1038/s41467-021-25440-7>.
- 808 Ait-El-Mkadem, Samira, Manal Dayem-Quere, Mirjana Gusic, Annabelle Chaussenot, Sylvie Bannwarth,  
809 Bérengère François, Emmanuelle C. Genin, et al. 2017. "Mutations in MDH2, Encoding a Krebs  
810 Cycle Enzyme, Cause Early-Onset Severe Encephalopathy." *American Journal of Human Genetics*  
811 100 (1): 151–59. <https://doi.org/10.1016/j.ajhg.2016.11.014>.
- 812 Altschul, S. F., W. Gish, W. Miller, E. W. Myers, and D. J. Lipman. 1990. "Basic Local Alignment Search  
813 Tool." *Journal of Molecular Biology* 215 (3): 403–10. [https://doi.org/10.1016/S0022-2836\(05\)80360-2](https://doi.org/10.1016/S0022-2836(05)80360-2).
- 814 Bailey, Matthew H., Collin Tokheim, Eduard Porta-Pardo, Sohini Sengupta, Denis Bertrand, Amila  
815 Weerasinghe, Antonio Colaprico, et al. 2018. "Comprehensive Characterization of Cancer Driver  
816 Genes and Mutations." *Cell* 173 (2): 371–85.e18. <https://doi.org/10.1016/j.cell.2018.02.060>.
- 817 Bakerlee, Christopher W., Angela M. Phillips, Alex N. Nguyen Ba, and Michael M. Desai. 2021.  
818 "Dynamics and Variability in the Pleiotropic Effects of Adaptation in Laboratory Budding Yeast  
819 Populations." *eLife* 10 (October). <https://doi.org/10.7554/eLife.70918>.
- 820 *BarcodeCounter2: Count DNA Barcodes Version 2*. n.d. Github. Accessed April 10, 2024.  
821 <https://github.com/sandeepvenkataram/BarcodeCounter2>.
- 822 Blount, Zachary D., Christina Z. Borland, and Richard E. Lenski. 2008. "Historical Contingency and the  
823 Evolution of a Key Innovation in an Experimental Population of *Escherichia Coli*." *Proceedings of the*  
824 *National Academy of Sciences of the United States of America* 105 (23): 7899–7906.  
825 <https://doi.org/10.1073/pnas.0803151105>.
- 826 Boles Eckhard, de Jong-Gubbels Patricia, and Pronk Jack T. 1998. "Identification and Characterization  
827 of MAE1, the *Saccharomyces Cerevisiae* Structural Gene Encoding Mitochondrial Malic Enzyme."  
828 *Journal of Bacteriology* 180 (11): 2875–82. <https://doi.org/10.1128/jb.180.11.2875-2882.1998>.
- 829 Bono, Lisa M., Leno B. Smith Jr, David W. Pfennig, and Christina L. Burch. 2017. "The Emergence of  
830 Performance Trade-Offs during Local Adaptation: Insights from Experimental Evolution." *Molecular*  
831 *Ecology* 26 (7): 1720–33. <https://doi.org/10.1111/mec.13979>.
- 832 Brown, James A., Gavin Sherlock, Chad L. Myers, Nicola M. Burrows, Changchun Deng, H. Irene Wu,  
833 Kelly E. McCann, Olga G. Troyanskaya, and J. Martin Brown. 2006. "Global Analysis of Gene  
834 Function in Yeast by Quantitative Phenotypic Profiling." *Molecular Systems Biology* 2 (January):  
835 2006.0001. <https://doi.org/10.1038/msb4100043>.
- 836 Chaithanya, Koppisetty Viswa, and Himanshu Sinha. 2023. "MKT1 Alleles Regulate Stress Responses  
837 through Posttranscriptional Modulation of Puf3 Targets in Budding Yeast." *Yeast* 40 (12): 616–27.  
838 <https://doi.org/10.1002/yea.3908>.
- 839 Chang, Yeonji, and Won-Ki Huh. 2018. "Ksp1-Dependent Phosphorylation of eIF4G Modulates Post-  
840 Transcriptional Regulation of Specific mRNAs under Glucose Deprivation Conditions." *Nucleic Acids*  
841 *Research* 46 (6): 3047–60. <https://doi.org/10.1093/nar/gky097>.
- 842 Chou, Hsin-Hung, Hsuan-Chao Chiu, Nigel F. Delaney, Daniel Segrè, and Christopher J. Marx. 2011.  
843 "Diminishing Returns Epistasis among Beneficial Mutations Decelerates Adaptation." *Science* 332  
844 (6034): 1190–92. <https://doi.org/10.1126/science.1203799>.
- 845 Cingolani, Pablo, Adrian Platts, Le Lily Wang, Melissa Coon, Tung Nguyen, Luan Wang, Susan J. Land,  
846 Xiangyi Lu, and Douglas M. Ruden. 2012. "A Program for Annotating and Predicting the Effects of  
847 Single Nucleotide Polymorphisms, SnpEff: SNPs in the Genome of *Drosophila Melanogaster* Strain  
848 w1118; Iso-2; Iso-3." *Fly* 6 (2): 80–92. <https://doi.org/10.4161/fly.19695>.
- 849 DeRisi, J. L., V. R. Iyer, and P. O. Brown. 1997. "Exploring the Metabolic and Genetic Control of Gene  
850 Expression on a Genomic Scale." *Science* 278 (5338): 680–86.  
851 <https://doi.org/10.1126/science.278.5338.680>.
- 852 Fisher, Kaitlin J., Sean W. Buskirk, Ryan C. Vignogna, Daniel A. Marad, and Gregory I. Lang. 2018.  
853 "Adaptive Genome Duplication Affects Patterns of Molecular Evolution in *Saccharomyces*  
854 *Cerevisiae*." *PLoS Genetics* 14 (5): e1007396. <https://doi.org/10.1371/journal.pgen.1007396>.
- 855 Good, Benjamin H., and Michael M. Desai. 2015. "The Impact of Macroscopic Epistasis on Long-Term

- 856 Evolutionary Dynamics." *Genetics* 199 (1): 177–90. <https://doi.org/10.1534/genetics.114.172460>.
- 857 Gupta, Saumya, Aparna Radhakrishnan, Pandu Raharja-Liu, Gen Lin, Lars M. Steinmetz, Julien
- 858 Gagneur, and Himanshu Sinha. 2015. "Temporal Expression Profiling Identifies Pathways Mediating
- 859 Effect of Causal Variant on Phenotype." *PLoS Genetics* 11 (6): e1005195.
- 860 <https://doi.org/10.1371/journal.pgen.1005195>.
- 861 Hanahan, Douglas. 2022. "Hallmarks of Cancer: New Dimensions." *Cancer Discovery* 12 (1): 31–46.
- 862 <https://doi.org/10.1158/2159-8290.CD-21-1059>.
- 863 Hanahan, Douglas, and Robert A. Weinberg. 2011. "Hallmarks of Cancer: The next Generation." *Cell* 144
- 864 (5): 646–74. <https://doi.org/10.1016/j.cell.2011.02.013>.
- 865 Harms, Michael J., and Joseph W. Thornton. 2014. "Historical Contingency and Its Biophysical Basis in
- 866 Glucocorticoid Receptor Evolution." *Nature* 512 (7513): 203–7. <https://doi.org/10.1038/nature13410>.
- 867 Hartwell, L. H., J. J. Hopfield, S. Leibler, and A. W. Murray. 1999. "From Molecular to Modular Cell
- 868 Biology." *Nature* 402 (6761 Suppl): C47–52. <https://doi.org/10.1038/35011540>.
- 869 Hong, Jungeui, and David Gresham. 2014. "Molecular Specificity, Convergence and Constraint Shape
- 870 Adaptive Evolution in Nutrient-Poor Environments." *PLoS Genetics* 10 (1): e1004041.
- 871 <https://doi.org/10.1371/journal.pgen.1004041>.
- 872 Iraqui, I., S. Vissers, B. André, and A. Urrestarazu. 1999. "Transcriptional Induction by Aromatic Amino
- 873 Acids in *Saccharomyces Cerevisiae*." *Molecular and Cellular Biology* 19 (5): 3360–71.
- 874 <https://doi.org/10.1128/MCB.19.5.3360>.
- 875 Jasmin, Jean-Nicolas, and Rees Kassen. 2007. "On the Experimental Evolution of Specialization and
- 876 Diversity in Heterogeneous Environments." *Ecology Letters* 10 (4): 272–81.
- 877 <https://doi.org/10.1111/j.1461-0248.2007.01021.x>.
- 878 Johnson, Milo S., Shreyas Gopalakrishnan, Juhee Goyal, Megan E. Dillingham, Christopher W. Bakerlee,
- 879 Parris T. Humphrey, Tanush Jagdish, et al. 2021. "Phenotypic and Molecular Evolution across
- 880 10,000 Generations in Laboratory Budding Yeast Populations." *eLife* 10 (January).
- 881 <https://doi.org/10.7554/eLife.63910>.
- 882 Kinsler, Grant, Kerry Geiler-Samerotte, and Dmitri A. Petrov. 2020. "Fitness Variation across Subtle
- 883 Environmental Perturbations Reveals Local Modularity and Global Pleiotropy of Adaptation." *eLife* 9
- 884 (December). <https://doi.org/10.7554/eLife.61271>.
- 885 Kinsler, Grant, Kara Schmidlin, Daphne Newell, Rachel Eder, Sam Apodaca, Grace Lam, Dmitri Petrov,
- 886 and Kerry Geiler-Samerotte. 2023. "Extreme Sensitivity of Fitness to Environmental Conditions:
- 887 Lessons from #1BigBatch." *Journal of Molecular Evolution* 91 (3): 293–310.
- 888 <https://doi.org/10.1007/s00239-023-10114-3>.
- 889 Kistler, M., K. Maier, and F. Eckardt-Schupp. 1990. "Genetic and Biochemical Analysis of Glutathione-
- 890 Deficient Mutants of *Saccharomyces Cerevisiae*." *Mutagenesis* 5 (1): 39–44.
- 891 <https://doi.org/10.1093/mutage/5.1.39>.
- 892 Komeili, A., K. P. Wedaman, E. K. O'Shea, and T. Powers. 2000. "Mechanism of Metabolic Control.
- 893 Target of Rapamycin Signaling Links Nitrogen Quality to the Activity of the Rtg1 and Rtg3
- 894 Transcription Factors." *The Journal of Cell Biology* 151 (4): 863–78.
- 895 <https://doi.org/10.1083/jcb.151.4.863>.
- 896 Kryazhimskiy, Sergey, Daniel P. Rice, Elizabeth R. Jerison, and Michael M. Desai. 2014. "Microbial
- 897 Evolution. Global Epistasis Makes Adaptation Predictable despite Sequence-Level Stochasticity."
- 898 *Science* 344 (6191): 1519–22. <https://doi.org/10.1126/science.1250939>.
- 899 Kurita, O., and Y. Nishida. 1999. "Involvement of Mitochondrial Aldehyde Dehydrogenase ALD5 in
- 900 Maintenance of the Mitochondrial Electron Transport Chain in *Saccharomyces Cerevisiae*." *FEMS*
- 901 *Microbiology Letters* 181 (2): 281–87. <https://doi.org/10.1111/j.1574-6968.1999.tb08856.x>.
- 902 Langmead, Ben, and Steven L. Salzberg. 2012. "Fast Gapped-Read Alignment with Bowtie 2." *Nature*
- 903 *Methods* 9 (4): 357–59. <https://doi.org/10.1038/nmeth.1923>.
- 904 Lapointe, Christopher P., Jonathan A. Stefely, Adam Jochem, Paul D. Hutchins, Gary M. Wilson, Nicholas
- 905 W. Kwiecien, Joshua J. Coon, Marvin Wickens, and David J. Pagliarini. 2018. "Multi-Omics Reveal
- 906 Specific Targets of the RNA-Binding Protein Puf3p and Its Orchestration of Mitochondrial
- 907 Biogenesis." *Cell Systems* 6 (1): 125–35.e6. <https://doi.org/10.1016/j.cels.2017.11.012>.
- 908 Lee, Chien-Der, and Benjamin P. Tu. 2015. "Glucose-Regulated Phosphorylation of the PUF Protein Puf3

- 909 Regulates the Translational Fate of Its Bound mRNAs and Association with RNA Granules.” *Cell*  
910 *Reports* 11 (10): 1638–50. <https://doi.org/10.1016/j.celrep.2015.05.014>.
- 911 Lee, Kyusung, and Ji-Sook Hahn. 2013. “Interplay of Aro80 and GATA Activators in Regulation of Genes  
912 for Catabolism of Aromatic Amino Acids in *Saccharomyces Cerevisiae*.” *Molecular Microbiology* 88  
913 (6): 1120–34. <https://doi.org/10.1111/mmi.12246>.
- 914 Levy, Sasha F., Jamie R. Blundell, Sandeep Venkataram, Dmitri A. Petrov, Daniel S. Fisher, and Gavin  
915 Sherlock. 2015. “Quantitative Evolutionary Dynamics Using High-Resolution Lineage Tracking.”  
916 *Nature* 519 (7542): 181–86. <https://doi.org/10.1038/nature14279>.
- 917 Liao, X., and R. A. Butow. 1993. “RTG1 and RTG2: Two Yeast Genes Required for a Novel Path of  
918 Communication from Mitochondria to the Nucleus.” *Cell* 72 (1): 61–71. [https://doi.org/10.1016/0092-8674\(93\)90050-z](https://doi.org/10.1016/0092-8674(93)90050-z).
- 920 Li, Fangfei, Aditya Mahadevan, and Gavin Sherlock. 2023. “An Improved Algorithm for Inferring  
921 Mutational Parameters from Bar-Seq Evolution Experiments.” *BMC Genomics* 24 (1): 246.  
922 <https://doi.org/10.1186/s12864-023-09345-x>.
- 923 Li, Fangfei, Jason Tarkington, and Gavin Sherlock. 2023. “Fit-Seq2.0: An Improved Software for High-  
924 Throughput Fitness Measurements Using Pooled Competition Assays.” *Journal of Molecular*  
925 *Evolution* 91 (3): 334–44. <https://doi.org/10.1007/s00239-023-10098-0>.
- 926 Li, Heng. 2011. “A Statistical Framework for SNP Calling, Mutation Discovery, Association Mapping and  
927 Population Genetical Parameter Estimation from Sequencing Data.” *Bioinformatics* 27 (21): 2987–  
928 93. <https://doi.org/10.1093/bioinformatics/btr509>.
- 929 Li, Heng, and Richard Durbin. 2009. “Fast and Accurate Short Read Alignment with Burrows–Wheeler  
930 Transform.” *Bioinformatics* 25 (14): 1754–60. <https://doi.org/10.1093/bioinformatics/btp324>.
- 931 Liu, Zhengchang, Takayuki Sekito, Mário Spírek, Janet Thornton, and Ronald A. Butow. 2003.  
932 “Retrograde Signaling Is Regulated by the Dynamic Interaction between Rtg2p and Mks1p.”  
933 *Molecular Cell* 12 (2): 401–11. [https://doi.org/10.1016/s1097-2765\(03\)00285-5](https://doi.org/10.1016/s1097-2765(03)00285-5).
- 934 Li, Yuping, Dmitri A. Petrov, and Gavin Sherlock. 2019. “Single Nucleotide Mapping of Trait Space  
935 Reveals Pareto Fronts That Constrain Adaptation.” *Nature Ecology & Evolution* 3 (11): 1539–51.  
936 <https://doi.org/10.1038/s41559-019-0993-0>.
- 937 Li, Yuping, Sandeep Venkataram, Atish Agarwala, Barbara Dunn, Dmitri A. Petrov, Gavin Sherlock, and  
938 Daniel S. Fisher. 2018. “Hidden Complexity of Yeast Adaptation under Simple Evolutionary  
939 Conditions.” *Current Biology: CB* 28 (4): 515–25.e6. <https://doi.org/10.1016/j.cub.2018.01.009>.
- 940 McAlister-Henn, L., and L. M. Thompson. 1987. “Isolation and Expression of the Gene Encoding Yeast  
941 Mitochondrial Malate Dehydrogenase.” *Journal of Bacteriology* 169 (11): 5157–66.  
942 <https://doi.org/10.1128/jb.169.11.5157-5166.1987>.
- 943 Melo, Diogo, Arthur Porto, James M. Cheverud, and Gabriel Marroig. 2016. “Modularity: Genes,  
944 Development and Evolution.” *Annual Review of Ecology, Evolution, and Systematics* 47  
945 (September): 463–86. <https://doi.org/10.1146/annurev-ecolsys-121415-032409>.
- 946 Murphy, J. Patrick, Ekaterina Stepanova, Robert A. Everley, Joao A. Paulo, and Steven P. Gygi. 2015.  
947 “Comprehensive Temporal Protein Dynamics during the Diauxic Shift in *Saccharomyces Cerevisiae*.”  
948 *Molecular & Cellular Proteomics: MCP* 14 (9): 2454–65. <https://doi.org/10.1074/mcp.M114.045849>.
- 949 Navarro-Aviño, J. P., R. Prasad, V. J. Miralles, R. M. Benito, and R. Serrano. 1999. “A Proposal for  
950 Nomenclature of Aldehyde Dehydrogenases in *Saccharomyces Cerevisiae* and Characterization of  
951 the Stress-Inducible ALD2 and ALD3 Genes.” *Yeast* 15 (10A): 829–42.  
952 [https://doi.org/10.1002/\(SICI\)1097-0061\(199907\)15:10A<829::AID-YEA423>3.0.CO;2-9](https://doi.org/10.1002/(SICI)1097-0061(199907)15:10A<829::AID-YEA423>3.0.CO;2-9).
- 953 Orr, H. A. 2000. “Adaptation and the Cost of Complexity.” *Evolution; International Journal of Organic*  
954 *Evolution* 54 (1): 13–20. <https://doi.org/10.1111/j.0014-3820.2000.tb00002.x>.
- 955 Park, Yeonwoo, Brian P. H. Metzger, and Joseph W. Thornton. 2022. “Epistatic Drift Causes Gradual  
956 Decay of Predictability in Protein Evolution.” *Science* 376 (6595): 823–30.  
957 <https://doi.org/10.1126/science.abn6895>.
- 958 Pawson, T., and N. Warner. 2007. “Oncogenic Re-Wiring of Cellular Signaling Pathways.” *Oncogene* 26  
959 (9): 1268–75. <https://doi.org/10.1038/sj.onc.1210255>.
- 960 Reinders, Jörg, Karina Wagner, Rene P. Zahedi, Diana Stojanovski, Beate Eyrich, Martin van der Laan,  
961 Peter Rehling, Albert Sickmann, Nikolaus Pfanner, and Chris Meisinger. 2007. “Profiling

- 962 Phosphoproteins of Yeast Mitochondria Reveals a Role of Phosphorylation in Assembly of the ATP  
963 Synthase\*." *Molecular & Cellular Proteomics: MCP* 6 (11): 1896–1906.  
964 <https://doi.org/10.1074/mcp.M700098-MCP200>.
- 965 Repetto, B., and A. Tzagoloff. 1989. "Structure and Regulation of KGD1, the Structural Gene for Yeast  
966 Alpha-Ketoglutarate Dehydrogenase." *Molecular and Cellular Biology* 9 (6): 2695–2705.  
967 <https://doi.org/10.1128/mcb.9.6.2695-2705.1989>.
- 968 Sanchez-Vega, Francisco, Marco Mina, Joshua Armenia, Walid K. Chatila, Augustin Luna, Konnor C. La,  
969 Sofia Dimitriadoy, et al. 2018. "Oncogenic Signaling Pathways in The Cancer Genome Atlas." *Cell*  
970 173 (2): 321–37.e10. <https://doi.org/10.1016/j.cell.2018.03.035>.
- 971 Schlossarek, Dennis, Marcin Luzarowski, Ewelina M. Sokołowska, Venkatesh P. Thirumalaikumar, Lisa  
972 Dengler, Lothar Willmitzer, Jennifer C. Ewald, and Aleksandra Skirycz. 2022. "Rewiring of the  
973 Protein-Protein-Metabolite Interactome during the Diauxic Shift in Yeast." *Cellular and Molecular Life*  
974 *Sciences: CMLS* 79 (11): 550. <https://doi.org/10.1007/s00018-022-04569-8>.
- 975 Sekito, Takayuki, Zhengchang Liu, Janet Thornton, and Ronald A. Butow. 2002. "RTG-Dependent  
976 Mitochondria-to-Nucleus Signaling Is Regulated by MKS1 and Is Linked to Formation of Yeast Prion  
977 [URE3]." *Molecular Biology of the Cell* 13 (3): 795–804. <https://doi.org/10.1091/mbc.01-09-0473>.
- 978 Sekito, T., J. Thornton, and R. A. Butow. 2000. "Mitochondria-to-Nuclear Signaling Is Regulated by the  
979 Subcellular Localization of the Transcription Factors Rtg1p and Rtg3p." *Molecular Biology of the Cell*  
980 11 (6): 2103–15. <https://doi.org/10.1091/mbc.11.6.2103>.
- 981 Sondka, Zbyslaw, Sally Bamford, Charlotte G. Cole, Sari A. Ward, Ian Dunham, and Simon A. Forbes.  
982 2018. "The COSMIC Cancer Gene Census: Describing Genetic Dysfunction across All Human  
983 Cancers." *Nature Reviews. Cancer* 18 (11): 696–705. <https://doi.org/10.1038/s41568-018-0060-1>.
- 984 Suissa, M., K. Suda, and G. Schatz. 1984. "Isolation of the Nuclear Yeast Genes for Citrate Synthase and  
985 Fifteen Other Mitochondrial Proteins by a New Screening Method." *The EMBO Journal* 3 (8): 1773–  
986 81. <https://doi.org/10.1002/j.1460-2075.1984.tb02045.x>.
- 987 Tung, Sudipta, Christopher W. Bakerlee, Angela M. Phillips, Alex N. Nguyen Ba, and Michael M. Desai.  
988 2021. "The Genetic Basis of Differential Autodiploidization in Evolving Yeast Populations." *G3* 11 (8).  
989 <https://doi.org/10.1093/g3journal/jkab192>.
- 990 Umekawa, Midori, and Daniel J. Klionsky. 2012. "Ksp1 Kinase Regulates Autophagy via the Target of  
991 Rapamycin Complex 1 (TORC1) Pathway." *The Journal of Biological Chemistry* 287 (20): 16300–  
992 310. <https://doi.org/10.1074/jbc.M112.344952>.
- 993 Van der Auwera, Geraldine A., and Brian D. O'Connor. 2020. *Genomics in the Cloud: Using Docker,*  
994 *GATK, and WDL in Terra.* "O'Reilly Media, Inc."  
995 <https://play.google.com/store/books/details?id=vsXaDwAAQBAJ>.
- 996 Venkataram, Sandeep, Barbara Dunn, Yuping Li, Atish Agarwala, Jessica Chang, Emily R. Ebel, Kerry  
997 Geiler-Samerotte, et al. 2016. "Development of a Comprehensive Genotype-to-Fitness Map of  
998 Adaptation-Driving Mutations in Yeast." *Cell* 166 (6): 1585–96.e22.  
999 <https://doi.org/10.1016/j.cell.2016.08.002>.
- 1000 Wagner, Günter P., and Lee Altenberg. 1996. "PERSPECTIVE: COMPLEX ADAPTATIONS AND THE  
1001 EVOLUTION OF EVOLVABILITY." *Evolution; International Journal of Organic Evolution* 50 (3): 967–  
1002 76. <https://doi.org/10.1111/j.1558-5646.1996.tb02339.x>.
- 1003 Wagner, Günter P., Mihaela Pavlicev, and James M. Cheverud. 2007. "The Road to Modularity." *Nature*  
1004 *Reviews. Genetics* 8 (12): 921–31. <https://doi.org/10.1038/nrg2267>.
- 1005 Wagner, Günter P., and Jianzhi Zhang. 2011. "The Pleiotropic Structure of the Genotype-Phenotype Map:  
1006 The Evolvability of Complex Organisms." *Nature Reviews. Genetics* 12 (3): 204–13.  
1007 <https://doi.org/10.1038/nrg2949>.
- 1008 Welch, John J., and David Waxman. 2003. "Modularity and the Cost of Complexity." *Evolution;*  
1009 *International Journal of Organic Evolution* 57 (8): 1723–34. <https://doi.org/10.1111/j.0014-3820.2003.tb00581.x>.
- 1010  
1011 Wilson, Wayne A., and Peter J. Roach. 2002. "Nutrient-Regulated Protein Kinases in Budding Yeast."  
1012 *Cell* 111 (2): 155–58. [https://doi.org/10.1016/s0092-8674\(02\)01043-7](https://doi.org/10.1016/s0092-8674(02)01043-7).
- 1013 Wiser, Michael J., Noah Ribeck, and Richard E. Lenski. 2013. "Long-Term Dynamics of Adaptation in  
1014 Asexual Populations." *Science* 342 (6164): 1364–67. <https://doi.org/10.1126/science.1243357>.

- 1015 Wünsche, Andrea, Duy M. Dinh, Rebecca S. Satterwhite, Carolina Diaz Arenas, Daniel M. Stoebel, and  
1016 Tim F. Cooper. 2017. "Diminishing>Returns Epistasis Decreases Adaptability along an Evolutionary  
1017 Trajectory." *Nature Ecology & Evolution* 1 (4): 61. <https://doi.org/10.1038/s41559-016-0061>.  
1018 Zampar, Guillermo G., Anne Kümmel, Jennifer Ewald, Stefan Jol, Bastian Niebel, Paola Picotti, Ruedi  
1019 Aebersold, Uwe Sauer, Nicola Zamboni, and Matthias Heinemann. 2013. "Temporal System-Level  
1020 Organization of the Switch from Glycolytic to Gluconeogenic Operation in Yeast." *Molecular Systems*  
1021 *Biology* 9: 651. <https://doi.org/10.1038/msb.2013.11>.

## 1022 **METHODS**

1023

### 1024 **Constructing barcoded populations from first-step mutants**

1025 To conduct second-step evolution experiments, we constructed barcoded populations for each  
1026 of five mutations (see table 1) that arose in the original 2-Day evolution experiment (Levy et al.  
1027 2015). Construction of the barcoded populations of *CYR1*, *GPB2*, and *TOR1* mutations was  
1028 previously described (Aggeli, Li, and Sherlock 2021). To barcode *IRA1-nonsense* and *IRA1-*  
1029 *missense* mutants, we followed a similar procedure. Specifically, we backcrossed the *IRA1*  
1030 mutants (*MAT $\alpha$* ) to GSY5375, a *MATa* ancestral S288C strain that harbors the pre-landing pad  
1031 locus (Aggeli, Li, and Sherlock 2021). After sporulation and tetrad dissection, we performed  
1032 Sanger sequencing to identify segregants that were *MAT $\alpha$* , carried the *IRA1* variant of interest,  
1033 and the pre-landing pad allele at the barcode locus, ensuring the removal of the barcode initially  
1034 labeling this strain. These segregants were used for downstream transformation of barcodes.

1035

1036 We then barcoded these strains with a low and high complexity barcode as described in Aggeli  
1037 et al. We first transformed in the low-complexity barcode by PCR-amplifying a region from the  
1038 L001 library, which harbors a NatMX selectable marker, half of *URA3*, an artificial intron, a low-  
1039 complexity barcode sequence, and a lox66 site. We then selected for successful transformants  
1040 using YPD + Nat plates and isolated 4 and 8 colonies for *IRA1-missense* and *IRA1-nonsense*  
1041 strains, respectively, each with a unique low-complexity barcode. For each of these strains, we  
1042 then transformed a library of high-complexity barcodes (pBAR3). After transformation, cells  
1043 were grown in YP + 2% galactose for 16hrs to induce Cre recombinase expression prior to  
1044 selection on SC-ura plates with 2% glucose. We then estimated the number of unique  
1045 transformants by counting the number of colonies grown from plating a dilution. We additionally  
1046 estimated the relative number of unique transformants by amplicon Illumina sequencing using  
1047 the sequencing primers described below.

1048

1049 To construct populations for evolution experiments, we pooled together transformants from  
1050 multiple high-complexity transformations, such that each barcode was equally represented in  
1051 each pool. This resulted in pools of ~100,000 high-complexity barcodes for each evolution  
1052 experiment with the exception of Evo2D *IRA1-missense* evolution pool which contained ~40,000  
1053 high-complexity barcodes. Transformants were pooled such that each low-complexity barcode  
1054 was only present in one evolution pool, allowing us later to identify evolution conditions based  
1055 on the identity of the low-complexity barcode. For Evo1D experiments, a pool of *IRA1-missense*  
1056 and *IRA1-nonsense* transformants was used, containing equal numbers in abundance, albeit  
1057 with ~32,000 unique *IRA1-missense* barcodes and ~60,000 *IRA1-nonsense* barcodes. A single  
1058 pool that contained barcoded populations of *CYR1*, *GPB2*, and *TOR1* mutants was used for the  
1059 second-step Evo1D and Evo3D experiments for these genotypes.

1060

### 1061 **Conducting evolution experiments.**

1062 We conducted evolution experiments with barcoded populations under identical conditions to  
1063 the original evolution experiment. Briefly, ~10<sup>8</sup> cells of each evolution population pool was

1064 inoculated in 50 mL of SC-ura + 2% dextrose + hygromycin in 500 mL Delong flasks and grown  
1065 overnight at 30°C with shaking at 223 rpm. 500 µL of saturated overnight culture was then  
1066 transferred to 100 mL of glucose-limited M3 medium (5x delft medium with 4% ammonium  
1067 sulfate and 1.5% dextrose) in 500 mL Delong flasks for the evolution experiment. For most of  
1068 the evolution experiments, the culture was split into 2 replicate flasks at this point. Second-step  
1069 Evo3D experiments from *IRA1-missense* or *IRA1-nonsense* mutants used 3 replicates each.  
1070 Cultures then propagated every 24, 48, or 72 hours for Evo1D, Evo2D, and Evo3D conditions,  
1071 respectively. At the time of transfer, a set volume was transferred into 100 mL of fresh medium.  
1072 In order to keep the bottleneck size consistent at  $\sim 5 \times 10^7$  viable cells, the volume varied by  
1073 condition. Evo2D conditions used 400 µl of transfer volume. Evo1D and Evo3D conditions used  
1074 500 µL of transfer volume, which accounted for decreased cell density and decreased cell  
1075 viability in these conditions, respectively. Two 1 mL volumes of saturated culture were frozen as  
1076 glycerol stocks. The remaining culture was spun down, resuspended in 5 mL of sorbitol freezing  
1077 solution (0.9M sorbitol, 100mM Tris pH 7.5, 100mM EDTA) and frozen at -20°C for subsequent  
1078 genomic DNA extraction and barcode library sequencing preparation.

1079

#### 1080 **Isolation of clones from evolution experiments.**

1081

1082 To isolate clones for fitness measurement experiments, quantification of growth phase  
1083 performances, and whole genome sequencing, we sorted individual cells as previously  
1084 described (Y. Li, Petrov, and Sherlock 2019) . Specifically, we sorted 480 individual cells (five  
1085 96-well plates) from each replicate evolution experiment into single wells of a 96-well plate with  
1086 100 µL of YPD medium. This resulted in a total of 80 plates ( $\sim 7,680$  sorted cells) across the 16  
1087 evolution experiments. Sorted cells were then grown at 30°C for 3 days without shaking until the  
1088 cells reached saturation. Saturated cultures (5µl) were then transferred to deep-well 96-well  
1089 plates with 300 µL of YPD. After 2 days of growth at 30°C without shaking, 100 µL of culture  
1090 were mixed with glycerol and frozen at -80°C. 20 µL of saturated culture were transferred to 96-  
1091 well PCR plates and frozen at -20°C. for barcode identification. Saturated culture was also  
1092 plated onto Benomyl plates to assay ploidy (Venkataram et al. 2016).

1093

#### 1094 *Barcode identification by Metagrid.*

1095 To identify the barcode associated with each well and ensure that multiple clones with the same  
1096 barcode were not kept for downstream fitness measurement experiments, we performed  
1097 sequencing on the barcodes of the clones in each well. Saturated culture (20µl) was transferred  
1098 to 96-well plates and frozen at -20°C. Cells were then lysed by incubation at 95°C for 15 min. 5  
1099 µL of lysed culture were used as the template for PCR amplification of the barcode region. We  
1100 performed two steps of PCR. In the first-step of PCR, we used a set of 72 forward and 64  
1101 reverse first-step primers, each with a unique 8-bp multiplexing tag, to combinatorially label  
1102 each well. After the first-step of PCR, 5 µL of each well's PCR product from 5 plates was pooled  
1103 together and the appropriate 250bp band was isolated using gel purification. A second-step of  
1104 PCR was then performed with standard Nextera primers. Amplicon libraries were then  
1105 sequenced on Illumina MiSeq or HiSeq machines.



1106  
1107 To computationally identify the barcodes associated with each well, we used BarcodeCounter2  
1108 to extract the multiplexing indexes and barcode regions from each read. We then associated  
1109 barcodes with each well by taking the barcode with the most reads per well, provided the well  
1110 had at least 200 reads, the barcode was at least 60% of the well's reads, and it received more  
1111 than 1.5x the second-highest barcode in the well. This resulted in identifying the locations of  
1112 1785 unique barcoded clones. This is lower than the highest possible number of 7,680 clones  
1113 due to a combination of some wells receiving multiple clones, multiple wells receiving cells of  
1114 the same barcode, and drop out due to sequencing depth. To further validate our approach, we  
1115 randomly selected 3 wells per plate and performed Sanger sequencing of their barcodes. Of the  
1116 wells where both barcodes were identified using the metagrid approach and Sanger reads were  
1117 of sufficiently high quality, over 85% of the barcodes matched. We subsequently pooled each  
1118 uniquely barcoded clone by evolution condition and parental strain, resulting in 4 pools of  
1119 barcoded lineages to be used for fitness measurement experiments.

1120  
1121 *Benomyl ploidy test.*

1122 To characterize the ploidy of each sorted clone, we performed a high-throughput ploidy test that  
1123 was previously developed (Venkataram et al. 2016). Saturated culture from cell sorting was  
1124 pinned onto YPD agar plates containing 20 mg/mL benomyl. Plates were then grown at 25°C for  
1125 2 days and then imaged. Clones with inhibited growth on the benomyl medium were identified  
1126 as diploids. Clones with normal growth on the benomyl medium were identified as haploids. See  
1127 "Mutation and ploidy classification" section below.

1128  
1129 **Constructing barcoded pools**

1130 To construct a pool of lineages for fitness measurement experiments, we generated one large  
1131 pool of barcoded lineages isolated from previous evolution experiments and the evolution  
1132 experiments described in this study. Briefly, one tube of each barcode pool was thawed and  
1133 grown in YPD at 30°C overnight. After the overnight growth, we pooled all barcode-sub pools  
1134 together, adjusting for the number of barcodes in each pool and the OD600 of the culture, such  
1135 that each barcode was equally represented in this big pool. This big pool was then split into 1  
1136 mL glycerol stock aliquots and frozen at -80°C.

1137  
1138 To precisely measure the mean fitness of the population, we constructed two pools of 60 neutral  
1139 lineages from Venkataram 2016 and Li 2019. Briefly, we identified barcodes that exhibited  
1140 neutral fitness estimates across all previous experiments done with these pools of barcoded  
1141 lineages (Venkataram et al. 2016; Y. Li et al. 2018; Y. Li, Petrov, and Sherlock 2019; Kinsler,  
1142 Geiler-Samerotte, and Petrov 2020). We then streaked out from glycerol stocks onto YPD  
1143 plates. A single colony was picked from each barcoded lineage and grown in 96-well deep-well  
1144 plates for 2 days. Wells for each collection of 60 neutrals were then pooled equally by volume.  
1145 Then, glycerol stocks were created with 1 mL of pooled culture and frozen at -80°C.

1146  
1147  
1148  
1149  
1150  
1151  
1152  
1153  
1154  
1155  
1156  
1157  
1158  
1159  
1160  
1161  
1162  
1163  
1164  
1165  
1166  
1167  
1168  
1169  
1170  
1171  
1172  
1173  
1174  
1175  
1176  
1177  
1178  
1179  
1180  
1181  
1182  
1183  
1184  
1185

### **Fitness measurement experiments**

To quantify fitness effects, we performed fitness measurement experiments. We streaked out DPY256 (an ancestor strain which harbors an ApaI restriction site in the barcode region) onto a YPD plate. After two days of growth, a colony was picked and grown up in 50 mL of YPD overnight. Additionally, one tube each of the 60-neutral pool from Venkataram 2016 and one tube of the 60-neutral pool from the Li 2019 pool was thawed and grown separately in 50 mL of YPD overnight.

$5 \times 10^7$  cells from DPY256 ancestor, each of the two neutral pools, and the big pool (see Constructing barcoded pools) were then separately inoculated into four 500 mL Delong flasks containing 100 mL of M3 medium for one cycle of pre-culture in the selective condition. This resulted in a total of 16 flasks of culture, corresponding to each set of barcoded cells and the four conditions.

After one cycle of growth (which corresponded to 24h for the 1-Day transfer condition, 48h for 2-Day, 72h for 3-Day, and 120h for 5-Day), the cultures were pooled by volume such that the big pool of barcoded lineages represented 2% or 5% of the population. In the 2% flasks, 2% of the population was the big pool of evolved lineages, 2% were Venkataram 2016 neutrals, 2% were Li 2019 neutrals, and 94% of the population was DPY256 ancestor. In the 5% flasks, 5% of the population was the big pool of evolved lineages, 2% were Venkataram 2016 neutrals, 2% were Li 2019 neutrals, and 91% of the population was DPY256 ancestor. These pools of lineages is considered "Timepoint 0" for each condition and pooling percentage.

We then transferred a set volume of this pool to replicate flasks (2 replicates for 1- and 2-Day experiments, 3 replicates for 3- and 5-Day experiments) containing 100 mL M3 medium such that  $\sim 5 \times 10^7$  of viable cells were transferred. This volume was 500  $\mu$ L for 1-, 3-, and 5-Day experiments and 400  $\mu$ L for 2-Day experiments. The culture was then grown at 30°C in an incubator shaking at 223 RPM. After the set amount of time corresponding to each condition, a fixed volume of culture (500  $\mu$ L for 1-, 3-, and 5-Day experiments and 400  $\mu$ L for 2-Day experiments) to fresh 100 mL of M3 medium in 500 mL DeLong flasks. This serial dilution was continued for until transfer 6 for 1- and 2-Day experiments and until transfer 2 for 3- and 5-Day experiments.

After each transfer, the remaining culture was frozen for downstream DNA extraction, barcode amplification, and sequencing. To freeze the culture, we transferred the culture to 50 mL conical tubes, spun down at 3000 rpm for 5 min, resuspending in 5 mL sorbitol freezing solution (0.9 M sorbitol, 0.1 M Tris-HCL pH 7.5, 0.1 M EDTA pH 8.0), aliquoted into three 1.5 mL tubes, and stored at  $-80^\circ\text{C}$ .

1186 **Genomic DNA extraction**

1187 Genomic DNA was extracted from frozen cells as described previously (Aggeli, Li, and Sherlock  
1188 2021). Briefly, 400  $\mu$ L of frozen cells in sorbitol solution was spun down at 3500 rpm for 3 min.  
1189 After discarding the supernatant, the cell pellet was then washed in 400  $\mu$ L of sterile water and  
1190 spun down at 3500 rpm for 3 min and the supernatant was discarded. The cell pellet was then  
1191 re-suspended in 400  $\mu$ L of extraction buffer (0.9 M sorbitol, 50 mM Na phosphate pH 7.5,  
1192 240  $\mu$ g/mL zymolase, 14 mM  $\beta$ -mercaptoethanol) and incubated at 37°C for 30min. We then  
1193 added 40  $\mu$ L of 0.5 M EDTA, 40  $\mu$ L of 10% SDS, and 56  $\mu$ L of proteinase K (Life Technologies  
1194 25530-015), vortexing after each addition. The mixture was then incubated at 65°C for 30 min.  
1195 After the incubation, tubes were placed on ice for 5 min and then 200  $\mu$ L of 5 M potassium  
1196 acetate were added and tubes were shaken to mix. Following a 30 min incubation on ice, the  
1197 samples were spun for 10 min at 17,000 rpm. The supernatant was transferred to a new 1.5 mL  
1198 tube containing 750  $\mu$ L of isopropanol and placed on ice for 5 min. We then spun the samples at  
1199 17,000 rpm for 10min and discarded the supernatant. The DNA pellet was then washed twice  
1200 with 750  $\mu$ L 70% ethanol, each time vortexing very briefly, spun at 17,000 rpm for 2 min, and  
1201 discarding the supernatant. After allowing the DNA pellet to dry completely, it was resuspended  
1202 in 50  $\mu$ L 10 mM Tris pH 7.5 or 50  $\mu$ L nuclease free water. We then added 1  $\mu$ L of 20 mg/mL  
1203 RNase A and subsequently incubated at 65°C for 30 min. DNA was then quantified using the  
1204 Qubit Range dsDNA assay kit.

1205

1206 **Restriction digest of ancestral strain's barcode**

1207 Because over 90% of the initial population during the fitness measurement experiments consists  
1208 of the ancestral strain, we sought to reduce the proportion of reads that represented its barcode  
1209 to reduce sequencing costs. We thus performed restriction digestion using the ApaLI restriction  
1210 site (GTGCAC) engineered into the barcode region of the DPY256 ancestral strain on DNA for  
1211 each sample prior to (and following) PCR amplification. We added 1  $\mu$ L of ApaLI (NEB  
1212 #R0507L) and 5.5  $\mu$ L of Cutsmart Buffer (NEB #R0507L) to genomic DNA and incubated at  
1213 37°C for at least 1hr. Note that no barcode strains besides the ancestral strain contain this  
1214 restriction site, due to the design of the barcode region.

1215

1216 **Barcode sequencing library preparation**

1217 To prepare sequencing libraries of the barcodes, we used a two-step PCR amplification  
1218 protocol, as previously described (Venkataram et al. 2016; Kinsler, Geiler-Samerotte, and  
1219 Petrov 2020; Y. Li et al. 2018). In the first step of PCR, we use HPLC-purified primers that  
1220 contain "inline indices" to label samples and 8-bp Unique Molecular Identifiers (UMIs) to identify  
1221 barcode reads from the same yeast cell that have been sequenced multiple times due to PCR  
1222 amplification.

1223

1224

1225 Step 1 forward primers:

|      |                                                                                                                |
|------|----------------------------------------------------------------------------------------------------------------|
| F201 | TCGTCGGCAGCGTC AGATGTGTATAAGAGACAG (N1:25252525)(N1)(N1) (N1)(N1)(N1) (N1)(N1)CGATGTT TAATATGGACTAAAGGAGGCTTTT |
| F202 | TCGTCGGCAGCGTC AGATGTGTATAAGAGACAG (N1:25252525)(N1)(N1) (N1)(N1)(N1) (N1)(N1)ACAGTGT TAATATGGACTAAAGGAGGCTTTT |
| F203 | TCGTCGGCAGCGTC AGATGTGTATAAGAGACAG (N1:25252525)(N1)(N1) (N1)(N1)(N1) (N1)(N1)TGACCAT TAATATGGACTAAAGGAGGCTTTT |
| F204 | TCGTCGGCAGCGTC AGATGTGTATAAGAGACAG (N1:25252525)(N1)(N1) (N1)(N1)(N1) (N1)(N1)GCCAATT TAATATGGACTAAAGGAGGCTTTT |
| F205 | TCGTCGGCAGCGTC AGATGTGTATAAGAGACAG (N1:25252525)(N1)(N1) (N1)(N1)(N1) (N1)(N1)ATCACGT TAATATGGACTAAAGGAGGCTTTT |
| F206 | TCGTCGGCAGCGTC AGATGTGTATAAGAGACAG (N1:25252525)(N1)(N1) (N1)(N1)(N1) (N1)(N1)CAGATCT TAATATGGACTAAAGGAGGCTTTT |
| F207 | TCGTCGGCAGCGTC AGATGTGTATAAGAGACAG (N1:25252525)(N1)(N1) (N1)(N1)(N1) (N1)(N1)GGCTACT TAATATGGACTAAAGGAGGCTTTT |
| F208 | TCGTCGGCAGCGTC AGATGTGTATAAGAGACAG (N1:25252525)(N1)(N1) (N1)(N1)(N1) (N1)(N1)TAGCTTT TAATATGGACTAAAGGAGGCTTTT |
| F209 | TCGTCGGCAGCGTC AGATGTGTATAAGAGACAG (N1:25252525)(N1)(N1) (N1)(N1)(N1) (N1)(N1)TTAGGCT TAATATGGACTAAAGGAGGCTTTT |
| F210 | TCGTCGGCAGCGTC AGATGTGTATAAGAGACAG (N1:25252525)(N1)(N1) (N1)(N1)(N1) (N1)(N1)ACTTGAT TAATATGGACTAAAGGAGGCTTTT |
| F211 | TCGTCGGCAGCGTC AGATGTGTATAAGAGACAG (N1:25252525)(N1)(N1) (N1)(N1)(N1) (N1)(N1)GATCAGT TAATATGGACTAAAGGAGGCTTTT |
| F212 | TCGTCGGCAGCGTC AGATGTGTATAAGAGACAG (N1:25252525)(N1)(N1) (N1)(N1)(N1) (N1)(N1)CTTGAT TAATATGGACTAAAGGAGGCTTTT  |

1226

1227 Step 1 reverse primers:

|      |                                                                                                                     |
|------|---------------------------------------------------------------------------------------------------------------------|
| R301 | GTCTCGTGGGCTCGG AGATGTGTATAAGAGACAG (N1:25252525)(N1)(N1) (N1)(N1)(N1) (N1)(N1)TATATACGC TCGAATTC AAGCTTAGATCTGATA  |
| R302 | GTCTCGTGGGCTCGG AGATGTGTATAAGAGACAG (N1:25252525)(N1)(N1) (N1)(N1)(N1) (N1)(N1)CGCTCTATC TCGAATTC AAGCTTAGATCTGATA  |
| R303 | GTCTCGTGGGCTCGG AGATGTGTATAAGAGACAG (N1:25252525)(N1)(N1) (N1)(N1)(N1) (N1)(N1)GAGACGCTCT TCGAATTC AAGCTTAGATCTGATA |
| R304 | GTCTCGTGGGCTCGG AGATGTGTATAAGAGACAG (N1:25252525)(N1)(N1) (N1)(N1)(N1) (N1)(N1)ATACTGCGT TCGAATTC AAGCTTAGATCTGATA  |
| R305 | GTCTCGTGGGCTCGG AGATGTGTATAAGAGACAG (N1:25252525)(N1)(N1) (N1)(N1)(N1) (N1)(N1)ACTAGCAGA TCGAATTC AAGCTTAGATCTGATA  |
| R306 | GTCTCGTGGGCTCGG AGATGTGTATAAGAGACAG (N1:25252525)(N1)(N1) (N1)(N1)(N1) (N1)(N1)TGAGCTAGC TCGAATTC AAGCTTAGATCTGATA  |
| R307 | GTCTCGTGGGCTCGG AGATGTGTATAAGAGACAG (N1:25252525)(N1)(N1) (N1)(N1)(N1) (N1)(N1)CTGCTACTC TCGAATTC AAGCTTAGATCTGATA  |
| R308 | GTCTCGTGGGCTCGG AGATGTGTATAAGAGACAG (N1:25252525)(N1)(N1) (N1)(N1)(N1) (N1)(N1)GCGTACGCA TCGAATTC AAGCTTAGATCTGATA  |

1228

1229 For the first step for PCR, we performed 8 or 16 reactions per sample, using ~4.8ug (ranging  
 1230 between 3ug and 7.5ug) of DNA per sample across all reactions. Each set of eight 50 µL  
 1231 reactions included 16 µ of 50mM MgCl<sub>2</sub>, 8 µL of 10 µM forward primer, 8 µL of 10 µM reverse  
 1232 primer, template DNA, and 200 µL of OneTaq HotStart 2X Master mix (NEB #M0484L). Three  
 1233 cycles of PCR was then carried out with the following steps:

- 1234 1. 94°C for 10min
- 1235 2. 94°C for 3min
- 1236 3. 55°C for 1min
- 1237 4. 68°C for 1 min
- 1238 5. Repeat steps 2-4 twice for a total of 3 cycles
- 1239 6. 68°C for 1min
- 1240 7. Hold at 4°C

1241

1242 The first-step PCR product was then column purified using the GeneJET Gel Extraction Kit  
 1243 (#K0692). Briefly, 100 µL of orange binding buffer were added to each 50 µL reaction. All 8 or  
 1244 16 reactions from a given sample were pooled into the same purification column in a vacuum  
 1245 manifold. We then washed the column with 750 µL of wash buffer over vacuum. Then, each  
 1246 column was spun for 30s at max speed to remove residual wash buffer. We then eluted into 47  
 1247 µL of nuclease free water by centrifuging and stored the samples at 4°C for the second step of  
 1248 PCR.

1249

1250 The second step of PCR further amplifies the barcodes and attaches Illumina indices as well as  
 1251 P5, P7 sequences for compatibility with Illumina sequencing, as done previously (Kinsler,  
 1252 Geiler-Samerotte, and Petrov 2020; Kinsler et al. 2023). We used Nextera Index Xt v2 primers  
 1253 (Illumina #FC-131–2004) with the following sequences:

1254

|      |                                                     |
|------|-----------------------------------------------------|
| S513 | AATGATACGGCGACCACCGAGATCTACACTCGACTAGTCGTCGGCAGCGTC |
| S515 | AATGATACGGCGACCACCGAGATCTACACTTCTAGCTTCGTCGGCAGCGTC |
| S516 | AATGATACGGCGACCACCGAGATCTACACCTAGAGTTCGTCGGCAGCGTC  |
| S517 | AATGATACGGCGACCACCGAGATCTACACGCGTAAGATCGTCGGCAGCGTC |
| S518 | AATGATACGGCGACCACCGAGATCTACACCTATTAAGTCGTCGGCAGCGTC |
| S520 | AATGATACGGCGACCACCGAGATCTACACAAGGCTATTCGTCGGCAGCGTC |
| S521 | AATGATACGGCGACCACCGAGATCTACACGAGCCTTATCGTCGGCAGCGTC |
| S522 | AATGATACGGCGACCACCGAGATCTACACTTATGCGATCGTCGGCAGCGTC |
| N716 | CAAGCAGAAGACGGCATAACGAGATTAGCGAGTGTCTCGTGGGCTCGG    |
| N718 | CAAGCAGAAGACGGCATAACGAGATGTAGCTCCGTCTCGTGGGCTCGG    |
| N719 | CAAGCAGAAGACGGCATAACGAGATTACTACGCGTCTCGTGGGCTCGG    |
| N720 | CAAGCAGAAGACGGCATAACGAGATAGGCTCCGGTCTCGTGGGCTCGG    |
| N721 | CAAGCAGAAGACGGCATAACGAGATGCAGCGTAGTCTCGTGGGCTCGG    |
| N722 | CAAGCAGAAGACGGCATAACGAGATCTGCGCATGTCTCGTGGGCTCGG    |
| N723 | CAAGCAGAAGACGGCATAACGAGATGAGCGCTAGTCTCGTGGGCTCGG    |
| N724 | CAAGCAGAAGACGGCATAACGAGATCGCTCAGTGTCTCGTGGGCTCGG    |
| N726 | CAAGCAGAAGACGGCATAACGAGATGTCTTAGGGTCTCGTGGGCTCGG    |
| N727 | CAAGCAGAAGACGGCATAACGAGATACTGATCGGTCTCGTGGGCTCGG    |
| N728 | CAAGCAGAAGACGGCATAACGAGATTAGCTGCAGTCTCGTGGGCTCGG    |
| N729 | CAAGCAGAAGACGGCATAACGAGATGACGTCGAGTCTCGTGGGCTCGG    |

1255

1256 Note that because of increased risk of index swapping associated with sequencing amplicons  
1257 on Illumina machines with ExAmp technology (Kinsler et al. 2023), we labeled each sample with  
1258 a unique combination of inline and Illumina indices. This allows for reads associated with index  
1259 swapping due to mis-incorporation of indices or template swapping on the sequencing machine  
1260 to be identified and removed from downstream analysis.

1261

1262 For the second step of PCR, we performed 3 reactions per sample. For each set of the 50  $\mu$ L  
1263 reactions, we used 45  $\mu$ L of column purified Step 1 PCR product, 2.5  $\mu$ L of the designated  
1264 forward Nextera XT Index V2 primer (e.g., N716), 2.5  $\mu$ L of the designated reverse Nextera XT  
1265 Index V2 primer (e.g., S513), 3  $\mu$ L of 10mM dNTP (Fisher Scientific #PR-U1515), 1.5  $\mu$ L of Q5  
1266 polymerase (NEB #M0491L), 30  $\mu$ L of Q5 buffer (NEB #M0491L), and 65.5  $\mu$ L of nuclease free  
1267 water. We then ran the following program on the thermocycler to amplify for 20 cycles:

1268

- 1269 1. 98°C 30s
- 1270 2. 98°C 10s
- 1271 3. 62°C 20s
- 1272 4. 72°C 30s
- 1273 5. Repeat steps 2-4 19 times (20 cycles total)
- 1274 6. 72°C 3min
- 1275 7. Hold at 4 C

1276

1277 We then performed column purification following a similar procedure to the purification from step  
1278 1, eluting instead into 30  $\mu$ L of nuclease free water.

1279

1280 Following the second step of PCR, in order to further remove any residual ancestral barcode  
1281 that were not digested before PCR amplification, we performed a second round of ApaLI  
1282 digestion, adding 3.5  $\mu$ L of Cutsmart buffer and 1  $\mu$ L of ApaLI restriction enzyme (NEB

1283 #R0507L) to each sample's Step 2 PCR product, digesting for at least 1 hr at 37°C. We then  
1284 performed gel extraction using the GeneJet gel purification kit for each sample, keeping the  
1285 350bp band representing intact barcode sequences. We then quantified the DNA concentration  
1286 for each sample using Qubit HS kit (ThermoFisher #Q32854), pooled such that each sample  
1287 was equally represented in the final library, and submitted for sequencing on Illumina  
1288 sequencing machines.

1289

### 1290 **Tracking evolution**

1291 To track the dynamics of the evolution experiment, estimate the fitness of lineages during the  
1292 evolution experiment, and infer the distribution of fitness effects, we extracted DNA and used  
1293 PCR amplification to generate libraries for sequencing as described above, with the exception of  
1294 not performing the ApaLI restriction digestion.

1295

1296 In order to identify barcode counts over time, we followed previously used custom scripts along  
1297 with bartender ([https://github.com/Sherlock-](https://github.com/Sherlock-Lab/Barcode_seq/blob/master/bartender_BC1_BC2.py)  
1298 [Lab/Barcode\\_seq/blob/master/bartender\\_BC1\\_BC2.py](https://github.com/Sherlock-Lab/Barcode_seq/blob/master/bartender_BC1_BC2.py)) to extract and cluster barcodes from  
1299 timepoints along the evolution trajectory.

1300

1301 To infer fitness effects, the mean fitness of the population, and infer the from the evolution  
1302 experiments themselves, we used FitMut1 (Levy et al. 2015; F. Li, Mahadevan, and Sherlock  
1303 2023). To infer the distribution of fitness effects from this data, we used an approach developed  
1304 in Levy et al 2015. The general idea of this approach is to infer the distribution of fitness effects  
1305 by counting the number of mutants arising with selection coefficients in the interval  $[s, s+ds]$   
1306 across the course of the evolution experiment. To infer a rate, we adjust the amount of time that  
1307 this mutant could have arisen and been detected based on the mean fitness of the population,  
1308 the time it takes for the mutant to establish, and its ability to rise to a detectable frequency in the  
1309 population. Specifically, the number of mutations in the interval  $[s, s+ds]$  is expected to be:

1310

$$1311 \quad \text{number of mutations in } ds = \mu(s)ds \times (s/c) \times N_e \int_0^{t-(1/s)\ln(n_0s/c)} e^{-\bar{x}(t)} dt$$

1312

1313 Where  $N_e = 7 \times 10^7$  is the effective population size,  $\bar{x}(t)$  is the mean fitness of the population  
1314 over time,  $c \sim 3.5$  is the offspring number variance, and  $n_0 \sim 1000$  is the effective lineage size. We  
1315 invert this function to estimate  $\mu(s)$ .

1316

### 1317 **Counting barcodes and calculating fitness from fitness measurement sequencing data**

1318 We used BarcodeCounter2 (Venkataram et al. 2016; *BarcodeCounter2: Count DNA Barcodes*  
1319 *Version 2*, n.d.) to assign reads to their associated samples and barcodes. Briefly, we extracted  
1320 the inline index, barcode, and UMI regions from each read using BLAST (Altschul et al. 1990) to  
1321 the known constraint region in the amplicon sequence. Then, we associated each read to its  
1322 corresponding condition and timepoint based on its combination of Illumina and inline indices.  
1323 We then used Bowtie2 (Langmead and Salzberg 2012) to map the extracted barcode regions to

1324 our known list of barcodes in the experiment, used UMIs to avoid over-counting duplicate reads,  
1325 and counted the number of barcodes per sample.

1326  
1327 To infer fitness values, we used the fitness inference procedure as developed previously. In  
1328 each time interval, a mutant's fitness is calculated as it's log-frequency change, adjusted by the  
1329 mean fitness of the population. We infer the mean fitness of the population by calculating the  
1330 log-frequency change of the set of 60 neutral lineages from Venkataram 2016.

1331  
1332

### 1333 **Frequency dependence**

1334 During the analysis of the fitness measurement data, we noticed a systematic shift of fitness  
1335 over the course of the experiment, with many barcoded mutants showing a decline in fitness  
1336 fitness in 1- and 2-Day experiments as the fraction of the population that was adaptive  
1337 increased, even after adjustment for changes in mean fitness (Figure S1). These trends were  
1338 not identified in previous experiments, and we suspect that this is due to frequency-dependent  
1339 fitness effects driven by the very strongly adaptive mutants. To avoid the influence of these  
1340 effects, we used only the first timepoint interval from 2-Day experiments (from timepoint 0 to  
1341 timepoint 1), as this kept our fitness measurements consistent with previous studies [cite  
1342 Kinsler, Li]. Throughout the rest of the study, 2-Day fitness refers to this measurement using  
1343 only early timepoints.

1344

### 1345 **Quantifying performances**

1346

1347 To quantify mutant performances in each phase of growth, we quantified differences between  
1348 fitnesses inferred from 1-, 2-, 3-, and 5-Day transfer experiments. Because the time interval  
1349 between 24 and 48 hours only contains respiration phase, we quantified respiration  
1350 performance per hour as:

$$1351 \text{ResPerHour} = \text{2-Day fitness} - \text{1-Day fitness} / 24\text{hrs}$$

1352

1353 To calculate fermentation performance, we removed the 4 hours worth of respiration  
1354 performance from the 1-Day fitness and divided the remaining fitness into the 16 hours of  
1355 fermentation performance (accounting for ~4 hours of lag phase):

$$1356 \text{FerPerHour} = (\text{1-Day fitness} - 4 * \text{ResPerHour}) / 16\text{hrs}$$

1357

1358 Because 1-Day fitness measurements are used for both respiration and fermentation  
1359 performances, there is the potential for noise in 1-Day measurements to introduce a relationship  
1360 between fermentation and respiration performances. To eliminate measurement noise from  
1361 having this influence, we used different replicates of the 1-Day fitness to calculate fermentation  
1362 and respiration performance. Specifically, we used the replicate 2 flasks to calculate respiration  
1363 performance and the replicate 1 flasks to calculate fermentation performance.

1364

1365 To infer stationary phase performance, we took the difference between 5- and 3-day fitness and  
1366 divided by 48hrs of time:

1367  $\text{StaPerHour} = (\text{5-Day fitness} - \text{3-Day fitness}) / 48\text{hrs}$

1368  
1369 To calculate the uncertainty of performances, we used error propagation from the estimated  
1370 errors of fitness. To calculate performances relative to parental strain, we computed the  
1371 difference between each mutant's performance and its parental strain. For *CYR1*, *GPB2*, *TOR1*,  
1372 and *IRA1-missense* second-step mutations, we used the mean of the neutral barcode strains as  
1373 the parental reference measurement. For *IRA1-nonsense* second-step mutations, for which no  
1374 neutral clones were isolated, we used the parental barcoded mutant present in the  
1375 pool of first-step mutants (denoted with a "+" in main text figures).

1376

### 1377 **Differences in selection pressure do not drive the shift towards modular adaptation**

1378

1379 To evaluate whether a systematic shift in selection pressure occurred during the second-step  
1380 evolution experiments, we identified mutants for which we called their evolution fitness from the  
1381 estimation of the distribution of fitness effects. Because many of the remaining mutants are pure  
1382 diploids whose spread may be dominated by measurement noise, we removed these mutants  
1383 from the list. This resulted in a set of 185 second-step mutants. We then performed a partial  
1384 correlation analysis between respiration performance and evolution fitness, accounting for  
1385 fitness measurement fitness. We find no evidence of such a relationship ( $p=0.74$ ,  $r=-0.02$ ).  
1386 Similarly, we find no relationship between fermentation performance and evolution fitness after  
1387 accounting for fitness measurement fitness ( $r=0.38$ ,  $p=0.613$ ).

1388

### 1389 **1-Day evolution experiment analysis**

1390

1391 To evaluate whether yeast adapting to a 1-Day transfer could further improve their fermentation  
1392 performance, we quantified the performance of 1-Day mutants as above. We identified several  
1393 mutants with fermentation performances meeting or exceeding the maximum fermentation  
1394 performance achieved by first-step mutants. Using a threshold of at least 2 standard errors  
1395 (which corresponds to a FDR of  $p<0.05$ ) a single second-step mutant that arose in the Evo1D  
1396 *IRA1-nonsense* population had fermentation performance that exceeded the first-step  
1397 maximum.

1398

### 1399 **Whole genome sequencing**

1400 We selected mutants for whole genome sequencing based on their fitness and performance in  
1401 the growth phase, such that we selected as many unique mutants as possible based on their  
1402 performances and those that had barcodes confidently identified by the metagrid. This resulted  
1403 in a total of 346 clones targeted for sequencing.

1404

1405 Clones that were selected for sequencing were grown in 500  $\mu\text{L}$  of YPD in 96-well deep well  
1406 plates for 2 days at 30°C without shaking. 400  $\mu\text{L}$  of saturated culture was collected from each



1407 well for genomic DNA extraction using the Invitrogen PureLink Pro 96 Genomic DNA Kit.  
1408 Libraries were prepared using a  $\frac{1}{5}$  dilution protocol of the Illumina DNA prep, using Illumina  
1409 Unique Dual Indexing primers.

1410

### 1411 **Variant calling**

1412 To identify variants from the sequencing data, we used bwa (H. Li and Durbin 2009) to align all  
1413 reads to the S288C reference genome (R64-1-1-20110203). We then used picard  
1414 (<https://broadinstitute.github.io/picard/>) to fix read groups and marked duplicate reads. We then  
1415 used GATK (version 4.2.0.0) (Van der Auwera and O'Connor 2020) to generate individual  
1416 GVCF files, merge GVCF files, and call genotypes on all samples. After removing samples with  
1417 less than 20x coverage, we removed variants according to the following filters: QD < 5, FS < 60,  
1418 SOR < 3, M! < 50, MQRankSum < -3.0, ReadPosRankSum < -5.0. After this filtering, we further  
1419 removed ancestral variants present in all samples, mitochondrial variants, variants with GQ less  
1420 than 70. This filtering resulted in 727 sites that were variable across our samples. We then  
1421 manually inspected all called variants, resulting in 631 manually verified variants. We then used  
1422 bcftools (H. Li 2011) to filter the vcf file to these verified variants and used snpEff (Cingolani et  
1423 al. 2012) to annotate variants.

1424

1425 We then assigned variants to the corresponding barcoded mutants based on plate position. To  
1426 check that our assignment was correct, we also verified the barcodes from the whole genome  
1427 sequencing reads. For the 326 mutants for which we had sufficient coverage of the barcode  
1428 region (at least 4 successfully-mapped barcode reads), 324 had the correct barcode identified.  
1429 We opted to not use sequencing information from the 2 samples with mismatching barcodes  
1430 between the sequencing and expected based on clone isolation barcode sequencing.

1431

1432 We further identified pre-existing mutations in which identical mutations were present in several  
1433 sequenced mutants of a given low-complexity barcode. These mutations were classified as  
1434 “pre-existing” mutations and ignored in downstream analyses except in cases where they  
1435 belonged to a putatively causal gene (see “Mutation and ploidy classification” section).

1436

### 1437 **Mutation and ploidy classification**

1438

1439 To identify mutations likely responsible for driving fitness gains in these experiments, we  
1440 identified putative adaptation-driving mutations by identifying mutations that occurred in genes  
1441 that were recurrently mutated across adaptive clones. Specifically, genes with 4 or more  
1442 mutations were classified as likely adaptation-driving. After classifying genes based on their  
1443 function, we further identified additional mutations as adaptation-driving due to their effect on  
1444 similar processes as recurrently mutated genes.

1445

1446 To classify the ploidy of mutations, we initially classified mutants according to their performance  
1447 in the benomyl assay. We additionally classified mutants as “pure diploids” and “neutral  
1448 haploids” by their similarity to the large cluster of haploids and diploids in terms of their fitness

1449 effects across all the conditions. Mutants that were within this large cluster of diploids but initially  
1450 classified as haploids according to the benomyl assay were classified as pure-diploids.

1451  
1452 From this initial ploidy classification, the majority of mutants which exhibited mutations in *PAB1*  
1453 were classified as diploids, perhaps reflecting a sensitivity of *PAB1* mutants to benomyl. We re-  
1454 classified all *PAB1* mutants as adaptive haploids with respiration performance relative to  
1455 parental strain less than 0.06. *PAB1* mutants with greater respiration performance were  
1456 classified as high-fitness diploids, consistent with the effect that auto-diploidization had on  
1457 mutations from other genes. Similarly, *PAN2* and *PAN3* mutants were classified as diploids and  
1458 have previously been shown to be susceptible to benomyl (Brown et al. 2006). Given we had  
1459 few of these mutations, we did not have enough information to reclassify these mutations as we  
1460 did for *PAB1*.

1461  
1462 **Data availability**

1463 Raw sequencing data is available on Short Read Archive under BioProject Number:  
1464 PRJNA1098711. Processed frequency counts, fitness data, performance data, and mutational  
1465 calls are available on Github: <https://github.com/grantkinsler/EvolvingFront>. All yeast strains are  
1466 available upon request.

1467  
1468 **Code availability**

1469 Code for all data processing and figure generation is available on Github:  
1470 <https://github.com/grantkinsler/EvolvingFront>

1471 **SUPPLEMENTARY FIGURES**

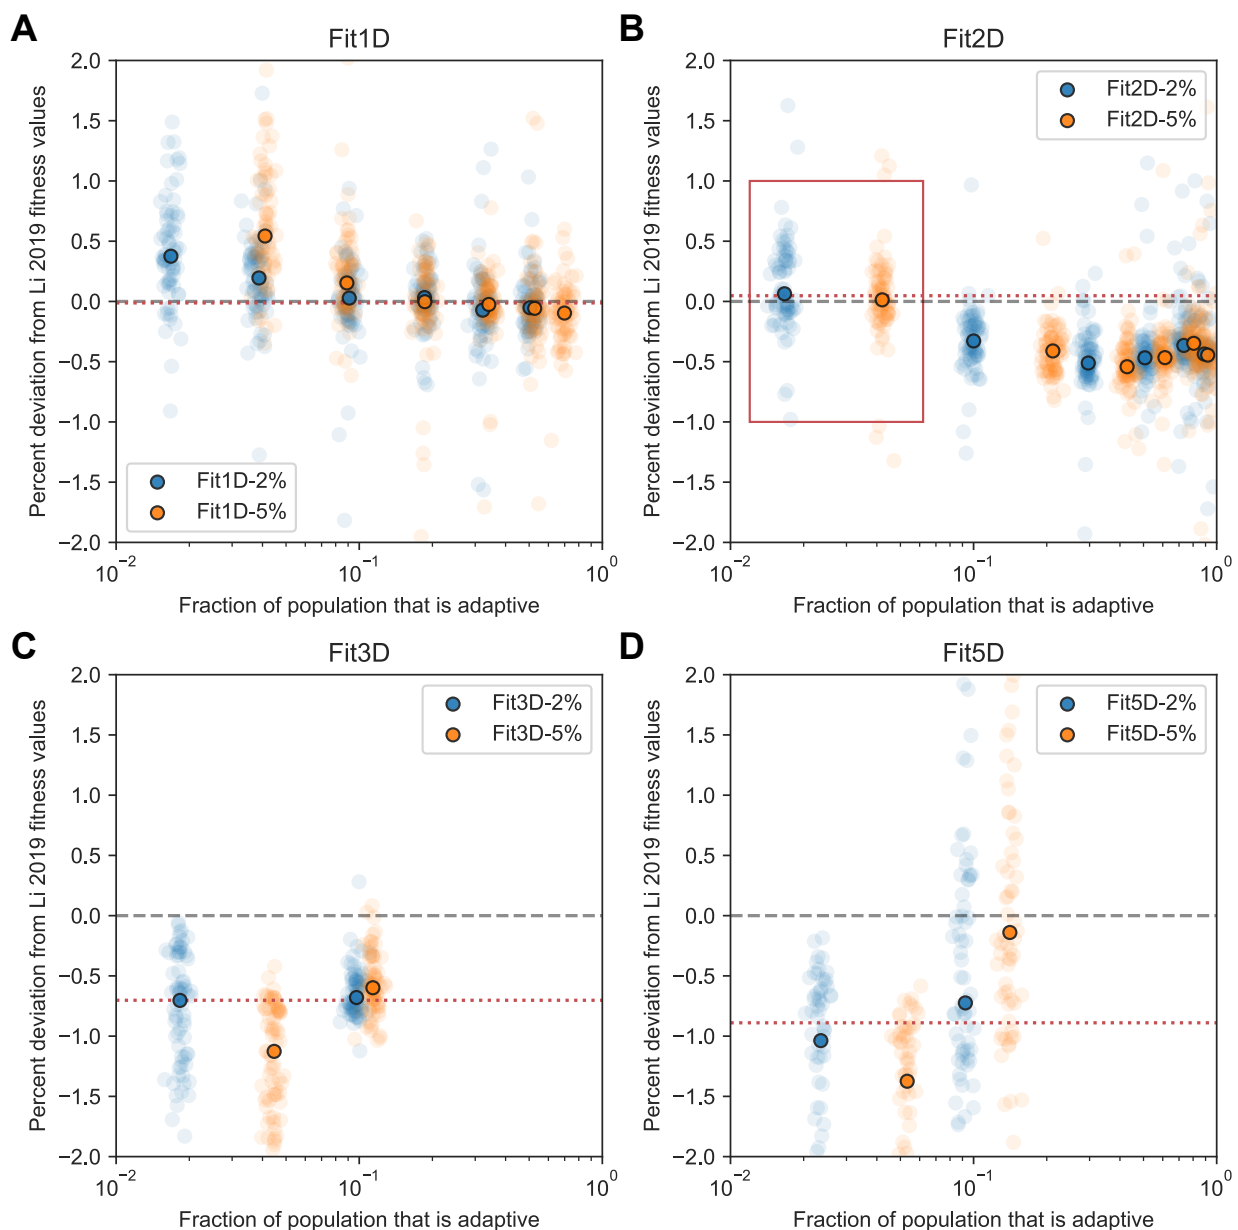

1472  
1473 **Fig S1. Evidence for frequency dependence in fitness measurement experiments.** The  
1474 vertical axis of each subplot depicts the percent deviation from Li 2019 fitness values for the set  
1475 of adaptive haploids that were present in Li 2019 fitness measurements and this study. The  
1476 horizontal axis is the fraction of the population that is adaptive. Points show the deviation for  
1477 each mutant, with the median across all mutants depicted by the heavy circle. Blue and orange  
1478 points are from experiments initiated with the adaptive barcode pool consisting of 2% and 5%  
1479 of the population, respectively. Red dotted line indicates the deviation for the overall fitness  
1480 measurement used throughout the paper. Red box in (B) refers to the timepoints used.  
1481 Subpanels A-D refer to Fit1D, Fit2D, Fit3D, and Fit5D fitness values, respectively.

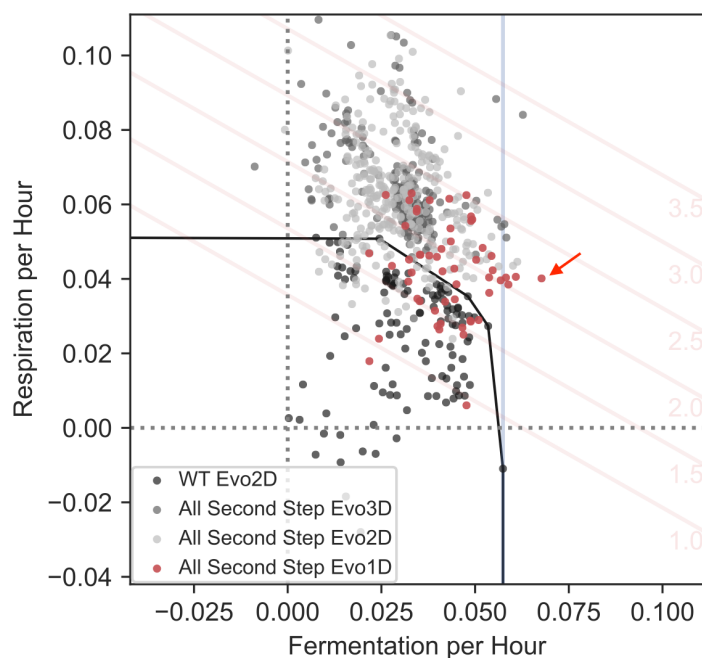

1482 **Fig S2. 1-Day evolution experiments identify mutants that improve fermentation**  
1483 **performance.** Fermentation and respiration performances for mutants discussed in the main  
1484 text and Evo1D mutants (in red). Despite less dense sampling, we find at least one Evo1D  
1485 mutant (indicated with red arrow) with fermentation performance that exceeds the highest  
1486 fermentation performance from first-step mutants (blue vertical line).

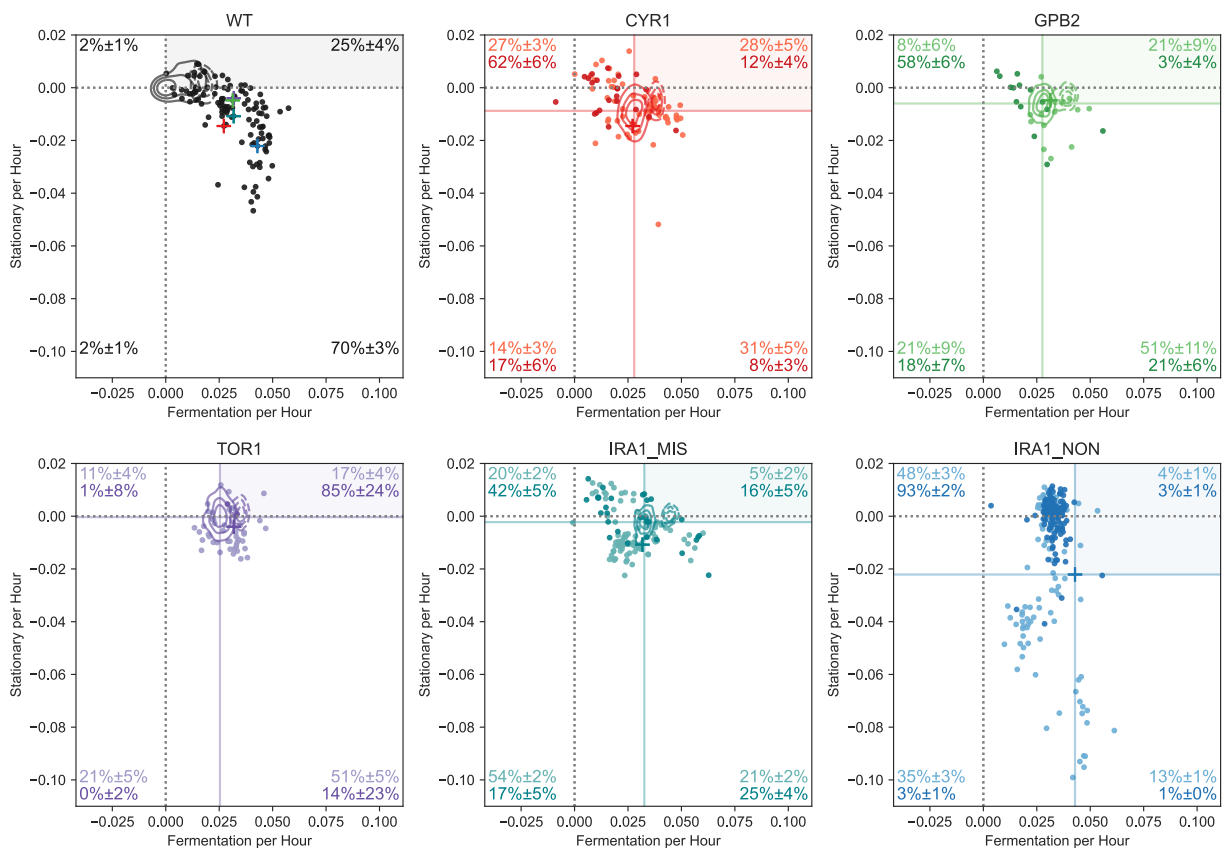

1487

1488

1489

1490

**Fig S3. Fermentation and stationary phase performances by parental strain.** Each subpanel depicts a scatter plot with the fermentation and stationary performances for each parental strain. Lighter points indicate Evo2D mutants, darker points indicate Evo3D mutants.

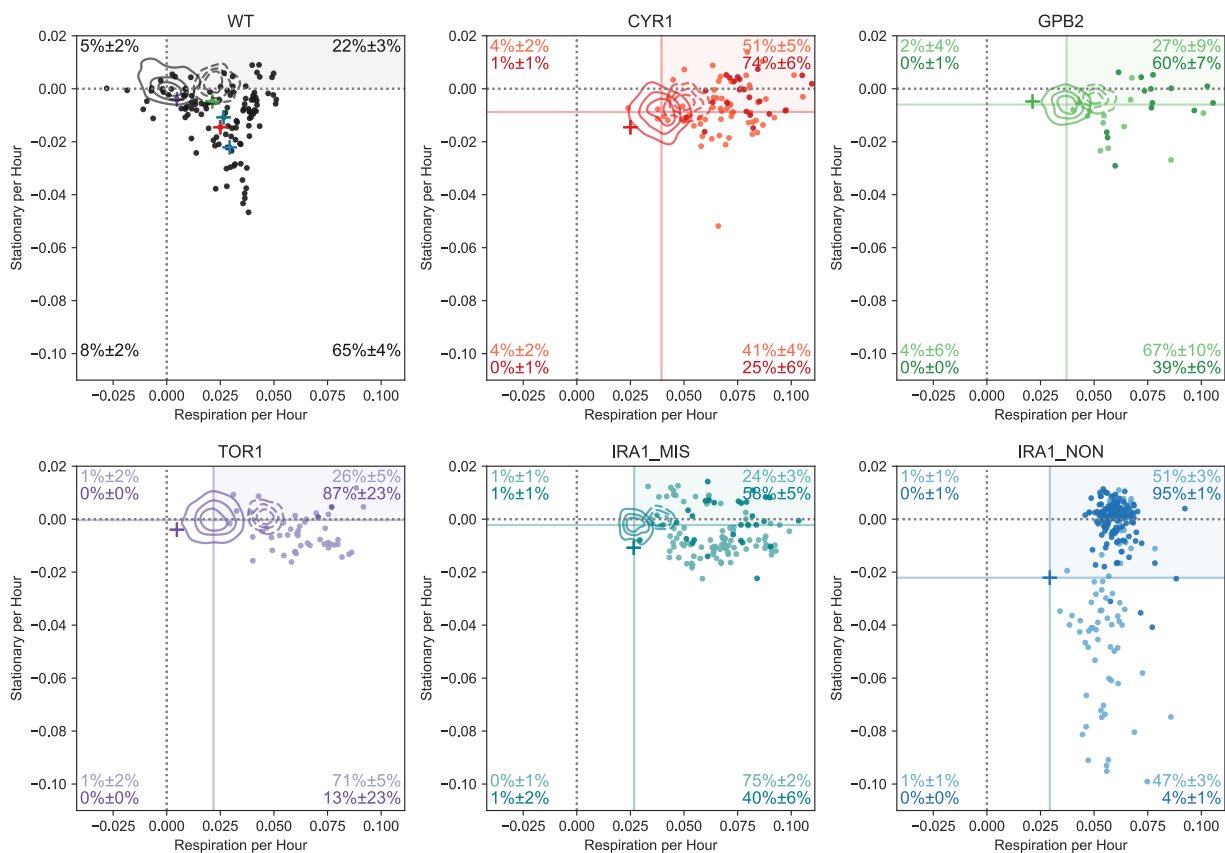

1491  
1492  
1493  
1494

**Fig S4. Respiration and stationary phase performances by parental strain.** Each subpanel depicts a scatter plot with the respiration and stationary performances for each parental strain. Lighter points indicate Evo2D mutants, darker points indicate Evo3D mutants.

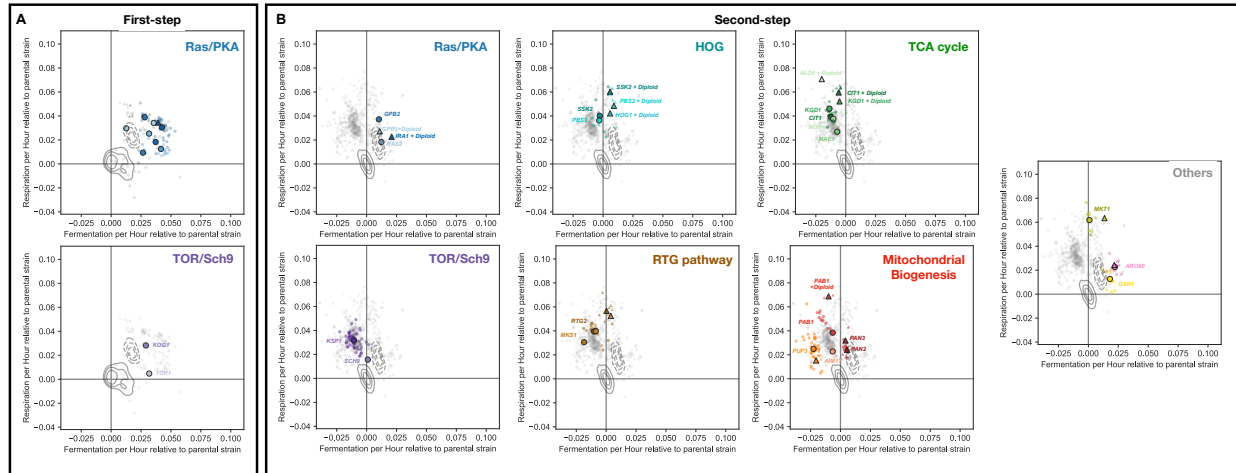

1495  
1496  
1497  
1498  
1499  
1500  
1501

**Fig S5. Molecular targets of adaptation by gene.** Performance effects of mutations separated by biological process or pathway as in Table 1. Points are colored by gene, and shape indicates ploidy (circles are haploids, triangles diploids). KDE estimates show density of neutral haploids for each parental strain (solid lines) and pure diploids for each parental strain (dashed lines). **(A)** First-step mutants. **(B)** Second-step mutants depicted, with performances measured relative to parental strain.

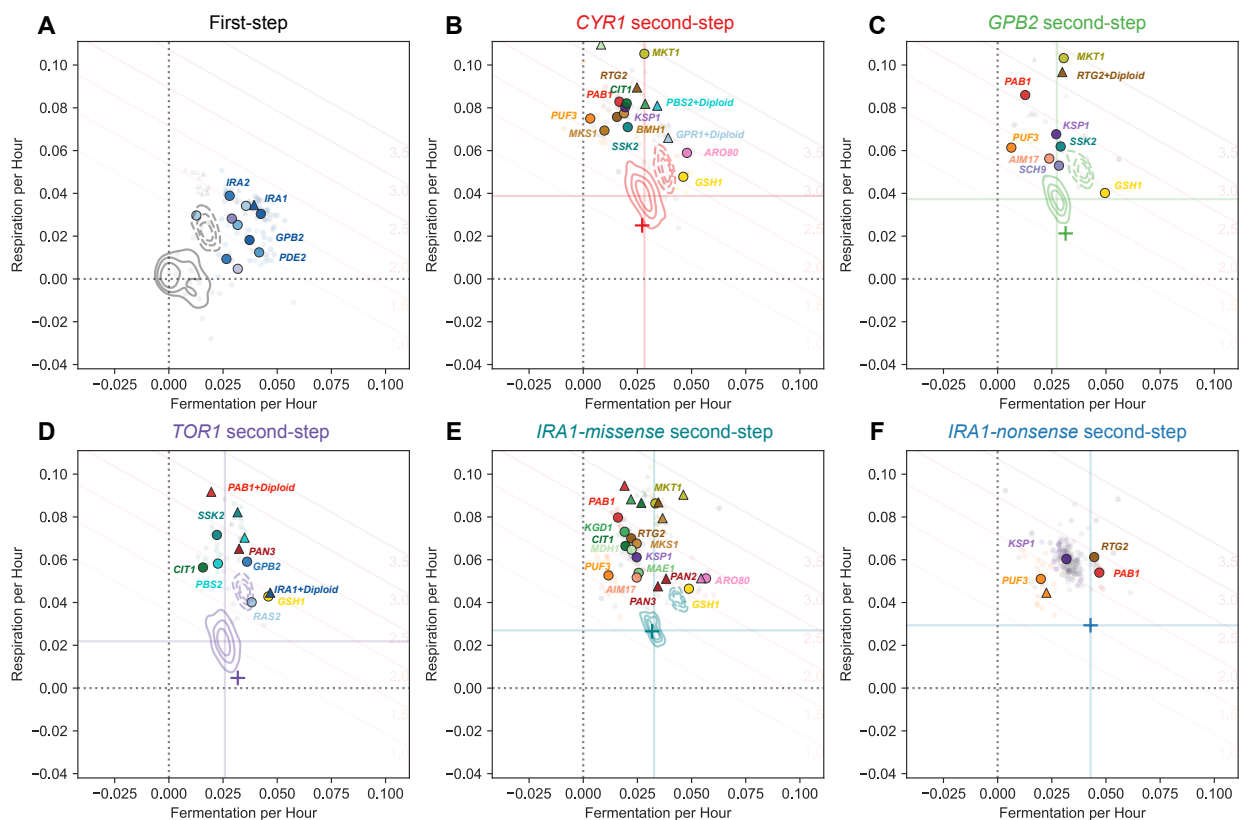

1502  
1503  
1504  
1505

**Fig S6. Molecular targets of adaptation by gene.** Colored by gene, shape depicts ploidy (circles are haploids, triangles diploids). KDE estimates show density of neutral haploids for each parental strain (solid lines) and pure diploids for each parental strain (dashed lines).



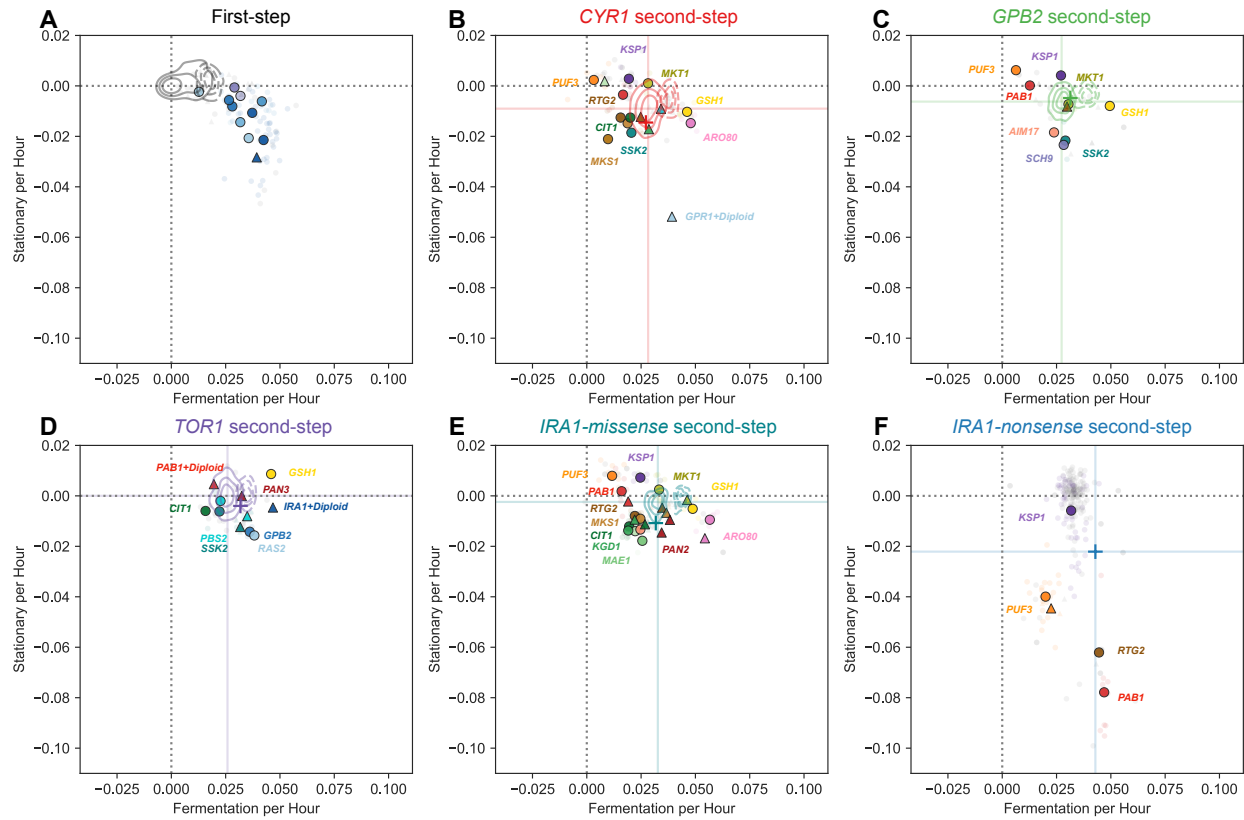

1506  
1507  
1508  
1509  
1510

**Fig S7. Mutational effects on fermentation and stationary phase performance.** Colored by gene, shape depicts ploidy (circles are haploids, triangles diploids). KDE estimates show density of neutral haploids for each parental strain (solid lines) and pure diploids for each parental strain (dashed lines).

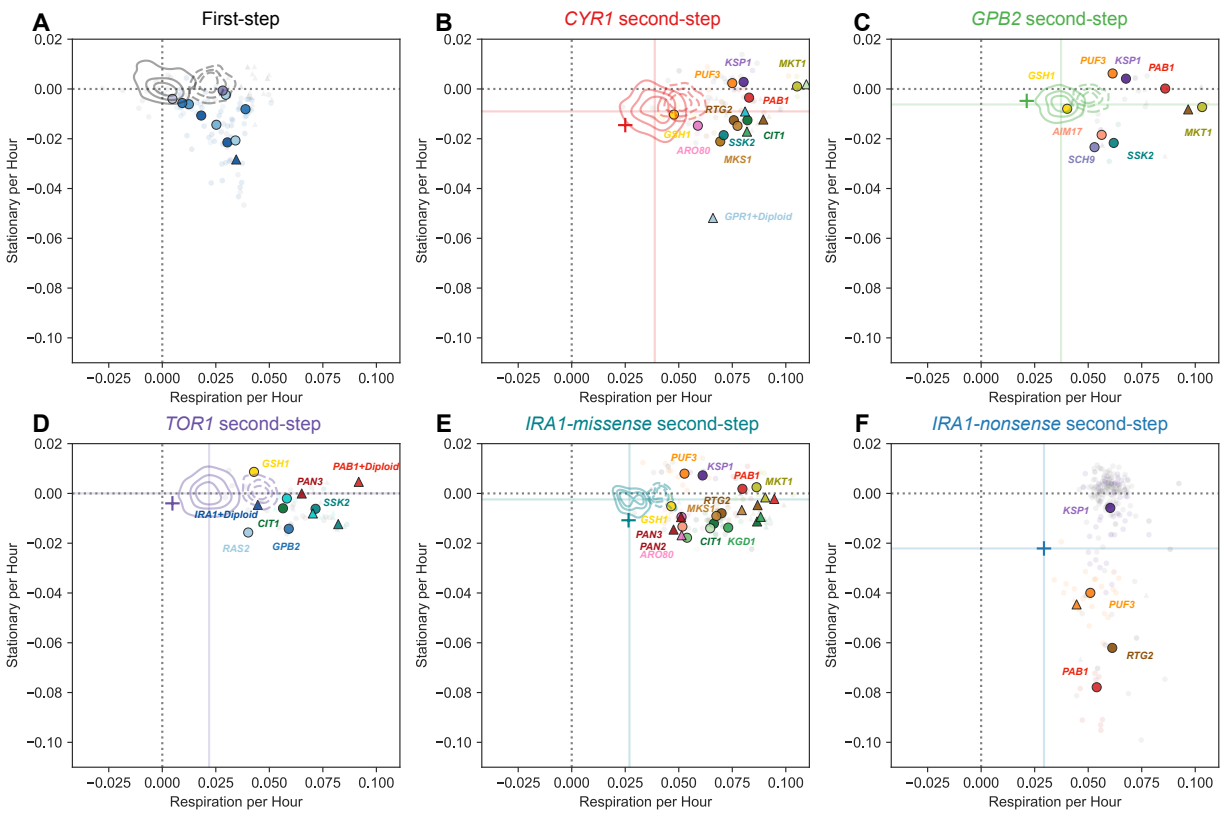

1511  
1512  
1513  
1514  
1515

**Fig S8. Mutational effects on respiration and stationary phase performance.** Colored by gene, shape depicts ploidy (circles are haploids, triangles diploids). KDE estimates show density of neutral haploids for each parental strain (solid lines) and pure diploids for each parental strain (dashed lines).
